1

2 **Apigenin relaxes rat intrarenal arteries: involvement of Cl<sup>-</sup> channels and K<sup>+</sup>**  
3 **channels**

4

5 Short running title: Apigenin relaxes intrarenal arteries

6

7 Yixin Jing\*, Miaomiao Dong<sup>§</sup>, Yu Liu<sup>§</sup>, Xiaomin Hou, Pengmei Guo, Weiping Li<sup>§</sup>, Mingsheng  
8 Zhang<sup>§</sup>✉ and Jiyuan Lv\* ✉

9

10 \*The First Clinical Hospital, Shanxi Medical University, Taiyuan 030001, Shanxi Province, China

11 <sup>§</sup>Department of Pharmacology, Shanxi Medical University, Xinjiannanlu 56, Taiyuan 030001,  
12 Shanxi Province, China

13

14 ✉These authors contributed equally to this work as correspondence authors.

15

16 Reprints: Mingsheng Zhang PhD, MD, Department of Pharmacology, Shanxi Medical University,  
17 Xinjiannanlu 56, Taiyuan 030001, Shanxi Province, China (zmspharmacol@sina.com). Jiyuan Lv,  
18 PhD, MD, The First Clinical Hospital, Shanxi Medical University, Taiyuan 030001, Shanxi  
19 Province, China (lvjiyuan11@163.com).

20

21 Acknowledgments

22 This study was supported by the National Natural Science Foundation of China (NSFC 81773738  
23 to MZ, NSFC81603111 to YL) and the Fund for Shanxi “1331 Project” Key Subjects  
24 Construction.

25

26 **Abstract**

27 The vasodilator effect of apigenin (API) was demonstrated in a number of vascular beds. We  
28 aimed to characterize the vasospasmolytic and electrophysiological effects of apigenin (API) in  
29 intrarenal arteries (IRAs). The vascular tone of male rat isolated IRAs was recorded with a  
30 myograph. Transmembrane Cl<sup>-</sup> currents through Ca<sup>2+</sup>-activated Cl<sup>-</sup> channels (CaCCs), K<sup>+</sup> currents  
31 through voltage-gated K<sup>+</sup> (Kv) channels and inwardly rectifier K<sup>+</sup> (Kir) channels were recorded  
32 with patch clamp in the freshly isolated arterial smooth muscle cells (ASMCs). Preincubation with  
33 API (10-100 μM) concentration-dependently depressed the contractions induced by KCl,  
34 9,11-dideoxy-9α,11α-methanoepoxy prostaglandin F<sub>2α</sub> (U46619), phenylephrine and vasopressin  
35 without significant preference and the IC<sub>50</sub> values were 13.27-26.26 μM. Acute application of API  
36 elicited instant relaxations in the IRAs precontracted with these vasoconstrictors and the RC<sub>50</sub>  
37 values were 5.80-24.33 μM. API relaxation was attenuated by chloride deprivation, CaCC  
38 blockers, Kv blocker and nitric oxide synthase inhibitor, but not by Kir blocker and  
39 cyclooxygenase inhibitor. At 10-100 μM, API depressed CaCC currents and Kir currents while  
40 enhanced Kv currents of IRA ASMCs. The present results demonstrate that API counteracts  
41 various vasoconstrictors noncompetitively and nonspecifically and suggest that modulation of  
42 CaCCs, Kv and Kir channels of IRA ASMCs is involved in its vasospasmolytic effects.

43

44 Key words: apigenin; intrarenal artery; vasorelaxation; flavonoid; calcium-activated chloride

1 channels; voltage-dependent potassium channels; inwardly rectifier potassium channels

2

3

## INTRODUCTION

4 Apigenin (API, C<sub>15</sub>H<sub>10</sub>O<sub>5</sub>, MW270.24), a natural flavonoid present in a lot of edible plants such  
5 as celery, parsley and oranges, possesses significant pharmacological activities and has been  
6 suggested to treat a variety of disorders such as cancers [1], neurodegeneration [2], metabolic  
7 syndrome [3], hyperlipidemia [4], vasodilative impairments [5-8] and vascular restenosis [9].

8 API-induced vasodilation was demonstrated in rat aorta [10-13], pial artery [14] and mesenteric  
9 artery [15]. The suggested mechanisms underlying its vasodilation include production of nitric  
10 oxide and guanosine 3', 5'-cyclic monophosphate, activation of transient receptor potential  
11 vanilloid 4 cation channel, calcium-activated potassium channels (K<sub>Ca</sub>) and ATP-sensitive  
12 potassium channels (K<sub>ATP</sub>), inhibition of extracellular Ca<sup>2+</sup> influx. Review and analysis of  
13 available reported researches point to that API may have multiple targets within vascular smooth  
14 muscle cells (VSMCs) and may be classified as a sort of pleiotropic drug. In this case, the exact  
15 mechanisms underlying its vasoactive actions need further deep investigations.

16

17 The K<sup>+</sup> channels are very important regulators of the myocyte membrane potential, vascular  
18 resistance and eventually blood flow [16,17]. Most commonly expressed K<sup>+</sup> channels in VSMCs  
19 are voltage-dependent K<sup>+</sup> channels (K<sub>v</sub>), inwardly rectifier K<sup>+</sup> channels (K<sub>ir</sub>), K<sub>Ca</sub> and K<sub>ATP</sub>. K<sub>v</sub>  
20 channels were proved to be involved in renal arterial tone regulation [18-20]. The existence and  
21 importance of K<sub>ir</sub> channels were also demonstrated in intrarenal arterioles (IRAs) [21,22]. Recent  
22 studies showed that calcium-activated Cl<sup>-</sup> channels (CaCCs) play a very important role in vascular  
23 tone modulation [23]. To our knowledge, the vasomotor effects of API on IRAs and  
24 electrophysiological effects of API on Cl<sup>-</sup> channels, K<sub>v</sub> channels and K<sub>ir</sub> channels of arterial  
25 smooth muscle cells (ASMCs) of IRAs have not been addressed. The present experiments were  
26 designed to obtain a clearer insight into the effects of API on IRAs and a deeper understanding on  
27 the underlying mechanisms.

28

29

## MATERIALS and METHODS

30

### Animals

31

32 Adult healthy male Sprague-Dawley rats (body weight: 250-300g) provided by Animal  
33 Center of Shanxi Medical University, China. All protocols and procedures of this study were  
34 approved by the Animal Care and Use Committee of Shanxi Medical University and conform to  
35 NIH guidelines for the care and use of laboratory animals. The second and third orders of  
36 intrarenal arteries (IRAs, inner diameter: 220-320 μm) were gently isolated for myograph and  
37 patch clamp study, after anesthesia with intraperitoneal administration of sodium pentobarbital (40  
38 mg/kg) and euthanasia.

38

39

### Drugs and Chemicals

40

41 Apigenin (API, HPLC>98%) was purchased from PERFEMIKER (Shanghai Canspec Scientific  
42 Instruments Co). 4-(2-hydroxyethyl) piperazine-1-ethanesulfonic acid (HEPES), ethylene  
43 glycol-bis(β-aminoethylether)-N,N,N',N'-tetraacetic acid (EGTA), 9, 11- dideoxy- 9α, 11α-  
44 methanoepoxy prostaglandin F<sub>2α</sub> (U46619), phenylephrine (PE), vasopressin (VP),  
4-aminopyridine (4-AP), NG-nitro-L-argininemethylester ester (L-NAME), tetraethylammonium

1 (TEA), niflumic acid (NFA), CaCC<sub>inh</sub>-A01, papain, indomethacin, bovine serum albumin,  
2 collagenase F, collagenase H and dithiothreitol were purchased from Sigma (St. Louis, MO,  
3 USA). API and indomethacin were dissolved in dimethylsulfoxide (DMSO) respectively just  
4 before use. When DMSO was used as solvent, its final concentration in the bath was less than  
5 0.1%. All other reagents were dissolved in distilled water just before use.

6

### 7 **Measurements of arterial tension and tissue bath solutions**

8 Isolation, mounting, vessel tone normalization, tissue bath solutions and general protocols were  
9 same as previously described [24] except illustrated elsewhere. Briefly, the cylindrical IRA rings  
10 (2 mm-long) were threaded with two 25- $\mu$ m-diameter stainless steel wires and mounted  
11 transversely on a wire myograph. The vessels were bathed in a chamber containing 5 ml of  
12 physiological saline solution (PSS) and stretched gently to opposite directions to produce a tone  
13 roughly equivalent to 80 mmHg. The normal PSS composed of (mM) 118 NaCl, 4.7 KCl, 1.2  
14 KH<sub>2</sub>PO<sub>4</sub>, 1.2 MgCl<sub>2</sub>•H<sub>2</sub>O, 20 NaHCO<sub>3</sub>, 10 HEPES, 2.5 CaCl<sub>2</sub> and was bubbled with 95% O<sub>2</sub> + 5%  
15 CO<sub>2</sub> at 37 °C, pH=7.4. In Cl<sup>-</sup>-free bath solution, NaCl, KCl, CaCl<sub>2</sub> and MgCl<sub>2</sub> were replaced with  
16 equal moles of sodium D-gluconate, potassium D-gluconate, calcium gluconate and magnesium  
17 sulfate respectively.

18

### 19 **Cell isolation and patch clamp study**

20 General procedures of isolation of single IRA ASMCS, preparation of electrodes, current  
21 recording and data analysis were same as previously described [24] except illustrated elsewhere.  
22 All currents were normalized with cell capacitance, expressed in pA/pF and recorded before  
23 (control), during the presence of API and after washout of API.

24 The chloride currents through CaCCs were recorded as reported methods [25], the bath solution  
25 contained (mM): 135 NaCl, 5.4 CsCl, 1 MgCl<sub>2</sub>, 1 CaCl<sub>2</sub>, 0.33 NaH<sub>2</sub>PO<sub>4</sub>, 5 TEA-Cl, 10 HEPES  
26 and 10 glucose (pH 7.35 adjusted with NaOH). The pipette solution contained (mM): 110 CsCl,  
27 20 TEA-Cl, 2 MgATP, 10 EGTA, 5 HEPES and 0.16 MgCl<sub>2</sub> (pH 7.2 adjusted with CsOH). CaCl<sub>2</sub>  
28 7.475 mM was also included to set the free Ca<sup>2+</sup> concentration at 500 nM. Contamination by other  
29 currents was minimized by replacing K<sup>+</sup> ions with Cs<sup>+</sup> and by adding TEA chloride in both pipette  
30 and bath solutions. Cell were held at holding potentials of -100 mV and subjected to step  
31 depolarizations of 500 ms to +100 mV in 10 mV increments.

32 To record K<sub>v</sub> current selectively, extracellular Ca<sup>2+</sup> was deprived from the cell bath solution and  
33 high concentration of ATP and EGTA were included in the pipette solution to minimize K<sub>ATP</sub> and  
34 K<sub>Ca</sub> currents [26]. The pipette solution consisted of (mM) 110 KCl, 1.2 MgCl<sub>2</sub>, 5 Na<sub>2</sub>ATP, 10  
35 HEPES, 10 EGTA, pH adjusted to 7.4 with KOH [26]. In this condition, the remainder currents  
36 recorded were markedly reduced by application of specific K<sub>v</sub> blocker 4-AP (3 mM) [27]. Cells  
37 were held at holding potentials of -60 mV and subjected to step depolarizations of 500 ms to +60  
38 mV in 10 mV increments. K<sub>v</sub> currents were recorded and current-voltage (I-V) curves were  
39 plotted with the readings at the end of the pulse.

40 In recording Kir current, the cell bath solution contained (mM): 140 NaCl, 5.4 KCl, 0.33  
41 NaH<sub>2</sub>PO<sub>4</sub>, 1.0 MgCl<sub>2</sub>, 1.8 CaCl<sub>2</sub>, 0.5 CdCl<sub>2</sub>, 5.0 HEPES, 10 glucose [28,29] and the pipette  
42 solution contained (mM): 100 potassium gluconate, 30 KCl, 5 EGTA, 5 HEPES, 1 MgCl<sub>2</sub>, 1  
43 Mg-ATP, 3 K<sub>2</sub>-ATP [28,29]. Both bath and pipette solution contained 4-AP (3 mM), TEA (3  
44 mM), glibenclamide (1  $\mu$ M) and nifedipine (1  $\mu$ M) in order to exclude transmembrane currents via

1  $K_v$ ,  $K_{Ca}$ ,  $K_{ATP}$ ,  $Ca^{2+}$  currents and other  $Ca^{2+}$ -activated currents [29-32]. Cells were held at -60 mV  
2 and subjected to stepwise test potentials from -160 mV to 0 mV in 10 mV increments for 500 ms  
3 at each potential [29,33]. Elicited currents were filtered at 1~2 kHz, averaged during the last 200  
4 ms of each step, normalized to cell capacitance and used for construction of I-V curves.

5

## 6 **Data analysis**

7 Results are means  $\pm$  SEM of *n* IRA rings or cells. Each ring or cell was isolated from a separate  
8 animal. Paired or unpaired Student's t-test was used to analyze data of two groups. Two-way  
9 analysis of variance (ANOVA) was performed for data of more than two groups. Differences were  
10 considered statistically significant when  $P < 0.05$ . The values of  $RC_{50}$  (vasodilator concentration  
11 needed to decline the precontraction by 50%),  $IC_{50}$  (antagonist concentration needed to depress the  
12 maximal contraction by 50%) and  $EC_{50}$  (agonist concentration needed to produce 50% of the  
13 maximal contraction) were calculated by non-linear regression with GraphPad Prism®, version  
14 6.00 (GraphPad Software, San Diego, CA, USA).

15

16

## RESULTS

### 17 **Effects of preincubation with API on KCl-, U46619-, PE-, VP-induced contraction**

18 KCl (20-108 mM, Fig. 1A), U46619 ( $10^{-8}$ - $10^{-5}$  M, Fig. 1B), PE ( $10^{-7}$ - $10^{-5}$  M, Fig. 1C) and VP  
19 ( $10^{-7}$ - $10^{-5}$  M, Fig. 1D) induced concentration-dependent contraction in IRA rings. The maximal  
20 contractions were  $7.64 \pm 3.08$  mN,  $10.63 \pm 2.87$  mN,  $8.40 \pm 2.10$  mN and  $9.19 \pm 4.93$  mN  
21 respectively; the values of  $EC_{50}$  were  $33.49 \pm 1.45$  mM,  $0.16 \pm 1.57$   $\mu$ M,  $0.51 \pm 1.14$   $\mu$ M and  $0.35$   
22  $\pm 1.25$   $\mu$ M respectively. Pretreatment with API shifted all of these concentration-contraction  
23 curves downwards and nonparallel to the right. At 100  $\mu$ M, API depressed the maximal  
24 contractions by  $81.15 \pm 33.35\%$ ,  $75.74 \pm 24.22\%$ ,  $84.05 \pm 37.96\%$  and  $91.73 \pm 23.98\%$  for KCl,  
25 U46619, PE and VP, respectively. The  $IC_{50}$  values of API were  $26.26 \pm 1.09$   $\mu$ M,  $18.19 \pm 1.01$   
26  $\mu$ M,  $22.77 \pm 1.14$   $\mu$ M and  $13.62 \pm 1.44$   $\mu$ M, respectively.

27

### 28 **Relaxation of API on the precontractions**

29 To observe the direct vasorelaxation of API on IRAs, API (1-100  $\mu$ M) was cumulatively added  
30 to the bath when the precontraction induced by KCl, U46619, PE or VP was sustained. Fig. 2  
31 showed that API concentration-dependently declined the precontractions (Fig. 2A) and the  $RC_{50}$   
32 values were  $24.33 \pm 2.75$   $\mu$ M,  $16.41 \pm 1.16$   $\mu$ M,  $17.89 \pm 1.21$   $\mu$ M,  $5.80 \pm 1.45$   $\mu$ M for KCl-,  
33 U46619-, PE- and VP-induced precontraction (Fig. 2B and C), respectively. DMSO (vehicle) at  
34 up to 0.1% failed to affect the precontractions.

35

### 36 **Effects of various inhibitors on API-induced relaxation in IRAs**

37 To explore the mechanisms underlying API-induced relaxation, inhibitor study was performed.  
38 As at 30  $\mu$ M, API produced a solid and repeatable relaxation on the precontractions induced by  
39 various agonists, we chose this concentration to study effects of various inhibitors on the  
40 relaxation. Addition of certain inhibitors might produce a superimposed contraction upon  
41 KCl-induced or U46619-induced precontraction in some rings. If the superimposed contraction  
42 surpassed 10% of the original precontraction, the results were discarded. Preincubation with  
43 L-NAME (0.01mM), 4-AP (0.3 mM), NFA (3  $\mu$ M) and  $CaCC_{inh}$ -A01 (3  $\mu$ M) reduced the  
44 API-induced relaxation by  $34.40 \pm 8.45\%$ ,  $30.30 \pm 9.26\%$ ,  $39.62 \pm 9.96\%$  and  $43.83 \pm 9.39\%$

1 upon 60 mM KCl-induced contraction (Fig.3A), and by  $36.09 \pm 9.08\%$ ,  $33.84 \pm 11.88\%$ ,  $38.03 \pm$   
2  $8.94\%$  and  $43.49 \pm 10.49\%$  upon 0.3  $\mu\text{M}$  U46619-induced contraction (Fig.3B). Neither Indo  
3 (0.01 mM) nor  $\text{BaCl}_2$  (30  $\mu\text{M}$ ) affected API-induced relaxation significantly.

4

#### 5 **Effect of $\text{Cl}^-$ deprivation on API-induced relaxation**

6 The possible involvement of chloride channels in API-induced relaxation was also studied by  
7 observing the influence of  $\text{Cl}^-$  deprivation on the relaxation. Preincubation for 30 min with  
8  $\text{Cl}^-$ -deprived PSS solution, in which NaCl, KCl,  $\text{CaCl}_2$  and  $\text{MgCl}_2$  were replaced correspondingly  
9 with equal moles of sodium gluconate, potassium gluconate, calcium gluconate and magnesium  
10 gluconate, reduced 60 mM  $\text{K}^+$ - and 0.3  $\mu\text{M}$  U46619-induced contraction by  $22.45 \pm 10.56\%$  and  
11  $28.14 \pm 12.89\%$  respectively. Fig.4 showed that compared with in normal PSS, API-induced  
12 relaxations on  $\text{K}^+$ -contraction in  $\text{Cl}^-$ -deprived PSS was reduced ( $52.15 \pm 19.33\%$  vs  $32.81 \pm$   
13  $17.35\%$ ,  $P < 0.05$ ; API relaxation on U46619 contraction in  $\text{Cl}^-$ -deprived PSS was reduced ( $58.92 \pm$   
14  $19.96\%$  vs  $39.31 \pm 17.91\%$ ,  $P < 0.05$ ).

15

#### 16 **Effects of API on $\text{Cl}^-$ currents of IRA ASMCs**

17 The stable peak  $\text{Cl}^-$  current at a testing potential of +100 mV was  $1338.52 \pm 207.15$  pA and  
18 current density was  $53.54 \pm 9.50$  pA/pF ( $n=7$ ). 4-AP (3 mM) suppressed voltage-dependent  
19 potassium channel current density by  $72.01 \pm 13.17\%$ . API (10, 30, 100  $\mu\text{M}$ ) reduced the peak  $\text{Cl}^-$   
20 current density by  $17.96 \pm 6.76\%$ ,  $44.58 \pm 12.57\%$ ,  $65.11 \pm 19.19\%$  respectively (Fig. 5A and B).  
21 The action of API was fast ( $\sim 20$  s), relatively stable within 3 min and reversible upon washout of  
22 the drug (Fig. 5C).

23

#### 24 **Effects of API on $\text{Kv}$ currents in IRA ASMCs**

25 The stable peak  $\text{Kv}$  current at a testing potential of +60 mV was  $1256.89 \pm 219.56$  pA and  
26 current density was  $43.34 \pm 9.35$  pA/pF ( $n=7$ ). API (10, 30, 100  $\mu\text{M}$ ) increased the peak  $\text{Kv}$   
27 current density by  $28.56 \pm 9.55\%$ ,  $54.90 \pm 9.49\%$ ,  $81.61 \pm 10.03\%$  respectively (Fig.6 A and B).  
28 Again, the action of API on  $\text{Kv}$  currents was reversible (Fig. 6C).

29

#### 30 **Effects of API on $\text{Kir}$ currents in IRA ASMCs**

31 The stable peak current of  $\text{Kir}$  at a testing potential of -160 mV was  $-313.24 \pm 77.43$  pA and  
32 current density was  $-22.67 \pm 5.16$  pA/pF ( $n=7$ ). API (10, 30, 100  $\mu\text{M}$ ) reduced the peak  $\text{Kir}$   
33 current density by  $12.57 \pm 4.29\%$ ,  $37.32 \pm 8.37\%$ ,  $46.63 \pm 9.22\%$ , respectively (Fig. 7 A, C, D).  
34 Similar to its action on CaCC currents and  $\text{Kv}$  currents, the action of API on  $\text{Kir}$  currents was fast  
35 and reversible upon washout of the drug (Fig. 7B).

36

37

## 37 **DISCUSSION**

38 The main findings of the present study are: 1. API was vasospasmolytic against various  
39 vasoconstrictors in IRAs. 2. API-induced IRA relaxation was attenuated by deprivation of  
40 extracellular chloride, CaCC blocker,  $\text{Kv}$  blocker and nitric oxide synthase inhibitor, but not by  
41  $\text{Kir}$  blocker and cyclooxygenase inhibitor. 3. API depressed CaCC currents and  $\text{Kir}$  currents while  
42 enhanced  $\text{Kv}$  currents of IRA ASMCs.

43

44 The present study demonstrated that, preincubation with API, at concentrations reachable after

1 oral administration [34,35], depressed depolarization-, U46619-, PE- and VP-induced IRA  
2 contractions and acute application of API of the same range of concentrations instantly declined  
3 the precontractions induced by these vasoconstrictors. Comparison of action potencies of API  
4 against these vasoconstrictors revealed the vasospasmodic characteristics of API on IRAs, that is,  
5 API counteracts these vasoconstrictors concentration-dependently, noncompetitively and  
6 nonspecifically.

7  
8 To explore the underlying mechanisms, inhibitor study was performed. API-induced  
9 vasorelaxation was significantly attenuated by nitric oxide synthase inhibitor L-NAME but not by  
10 cyclooxygenase inhibitor indomethacin, suggesting that nitric oxide production but not prostanoid  
11 production is involved in the vasorelaxation. This is consistent with the reported results that API  
12 vasorelaxation in rat pial arteries was attenuated by inhibition of nitric oxide synthase [14] and  
13 that API enhanced rat aortic endothelial nitric oxide synthase activity and endothelial nitric oxide  
14 synthesis [6]. API relaxation was also reduced by  $\text{Cl}^-$  deprivation, NFA,  $\text{CaCC}_{\text{inh}}\text{-A01}$  and 4-AP,  
15 suggesting that chloride channels, Kv channels may be involved in the relaxation.

16  
17 A variety of ion channels expressed in VSMCs play a crucial role in regulating vascular tone.  
18 Among these ion channels are CaCCs, Kv and Kir. In VSMCs,  $\text{Cl}^-$  accumulated above the  
19 electrochemical equilibrium and when VSMC CaCCs are activated, intracellular  $\text{Cl}^-$  effluxes,  
20 leading to the cell membrane depolarization, consequent activation of voltage dependent  $\text{Ca}^{2+}$   
21 channels and elevation of  $[\text{Ca}^{2+}]_i$ . Therefore, opening of CaCCs facilitates elevation of the tone of  
22 VSMCs [36]. On the other hand, concentration of  $\text{K}^+$  inside VSMCs is much higher than outside.  
23 Opening of  $\text{K}^+$  channels leads to hyperpolarization of the cell membrane, consequently depresses  
24  $[\text{Ca}^{2+}]_o$  influx and eventually resists the myocyte contraction [37]. Previous studies demonstrated  
25 that API relaxed rat aorta and suggested that inhibition of transmembrane  $[\text{Ca}^{2+}]_o$  influx through  
26 voltage dependent  $\text{Ca}^{2+}$  channels underlay API-induced vasorelaxation [11,12]. Enhancement of  
27 transient receptor potential vanilloid 4 cation channels was also suggested being involved in  
28 API-induced vasorelaxation of rat mesenteric arteries [15] and in API-induced protection against  
29 hypertension-associated renal damage [38].

30  
31 To clarify the possible involvement of ion channels other than  $\text{Ca}^{2+}$  channels in the vascular  
32 effects of API, we investigated the impacts of API on CaCCs, Kir and Kv channels in IRA  
33 ASMCs using the whole-cell patch clamp technique. As expected in the light of the results of the  
34 myograph experiments, at the same concentration range as used in myograph study, API  
35 concentration-dependently depressed CaCC currents of IRA ASMCs and shifted the CaCC I-V  
36 curves downwards. The depression was reversible because the normal CaCC currents largely  
37 recovered after removal of API from the cell bath by washout. As for  $\text{K}^+$  channels, the effects of  
38 API were complicated. API enhanced Kv currents while depressed Kir currents of IRA ASMCs.  
39 The enhancement on Kv currents is in accordance, while the inhibition on Kir currents is  
40 inconsistent with its vasorelaxation in IRAs. This suggests complexity and pleiotropism of API  
41 actions. The present study cannot give a satisfactory explanation on this disagreement. In this  
42 connection, API actions and the underlying mechanisms on ion channels appeal for further deeper  
43 investigation.

44



1 Taken together, the present study, for the first time, demonstrated the vasorelaxation of API on  
2 IRAs and suggested that depression of CaCCs, enhancement of Kv and increased nitric oxide  
3 synthesis may be involved in API-induced IRA relaxation.

4

5

6

## REFERENCES

7

1. Madunic J, Madunic IV, Gajski G, Popic J, Garaj-Vrhovac V (2018) Apigenin: A dietary flavonoid with  
8 diverse anticancer properties. *Cancer Lett* 413: 11-22.

8

9

2. Nabavi SF, Khan H, D'Onofrio G, Samec D, Shirooie S, et al. (2017) Apigenin as neuroprotective  
9 agent: Of mice and men. *Pharmacol Res*.

10

11

3. Escande C, Nin V, Price NL, Capellini V, Gomes AP, et al. (2013) Flavonoid apigenin is an inhibitor of  
12 the NAD<sup>+</sup> ase CD38: implications for cellular NAD<sup>+</sup> metabolism, protein acetylation, and  
13 treatment of metabolic syndrome. *Diabetes* 62: 1084-1093.

13

14

4. Zhang K, Song W, Li D, Jin X (2017) Apigenin in the regulation of cholesterol metabolism and  
15 protection of blood vessels. *Exp Ther Med* 13: 1719-1724.

15

16

5. Ren B, Qin W, Wu F, Wang S, Pan C, et al. (2016) Apigenin and naringenin regulate glucose and lipid  
17 metabolism, and ameliorate vascular dysfunction in type 2 diabetic rats. *Eur J Pharmacol*  
18 773: 13-23.

18

19

6. Qin W, Ren B, Wang S, Liang S, He B, et al. (2016) Apigenin and naringenin ameliorate  
20 PKCβ<sub>1</sub>-associated endothelial dysfunction via regulating ROS/caspase-3 and NO pathway  
21 in endothelial cells exposed to high glucose. *Vascul Pharmacol* 85: 39-49.

21

22

7. Jin BH, Qian LB, Chen S, Li J, Wang HP, et al. (2009) Apigenin protects endothelium-dependent  
23 relaxation of rat aorta against oxidative stress. *Eur J Pharmacol* 616: 200-205.

23

24

8. Ma X, Li YF, Gao Q, Ye ZG, Lu XJ, et al. (2008) Inhibition of superoxide anion-mediated impairment  
25 of endothelium by treatment with luteolin and apigenin in rat mesenteric artery. *Life Sci* 83:  
26 110-117.

26

27

9. Guan H, Gao L, Zhu L, Yan L, Fu M, et al. (2012) Apigenin attenuates neointima formation via  
28 suppression of vascular smooth muscle cell phenotypic transformation. *J Cell Biochem* 113:  
29 1198-1207.

29

30

10. Zhang YH, Park YS, Kim TJ, Fang LH, Ahn HY, et al. (2000) Endothelium-dependent vasorelaxant  
31 and antiproliferative effects of apigenin. *Gen Pharmacol* 35: 341-347.

31

32

11. Chan EC, Pannangpetch P, Woodman OL (2000) Relaxation to flavones and flavonols in rat isolated  
33 thoracic aorta: mechanism of action and structure-activity relationships. *J Cardiovasc*  
34 *Pharmacol* 35: 326-333.

34

35

12. Ko FN, Huang TF, Teng CM (1991) Vasodilatory action mechanisms of apigenin isolated from  
36 *Apium graveolens* in rat thoracic aorta. *Biochim Biophys Acta* 1115: 69-74.

36

37

13. Calderone V, Chericoni S, Martinelli C, Testai L, Nardi A, et al. (2004) Vasorelaxing effects of  
38 flavonoids: investigation on the possible involvement of potassium channels. *Naunyn*  
39 *Schmiedeberg's Arch Pharmacol* 370: 290-298.

39

40

14. Mastantuono T, Battiloro L, Sabatino L, Chiurazzi M, Di Maro M, et al. (2015) Effects of Citrus  
41 Flavonoids Against Microvascular Damage Induced by Hypoperfusion and Reperfusion in Rat  
42 Pial Circulation. *Microcirculation* 22: 378-390.

42

43

15. Ma X, He D, Ru X, Chen Y, Cai Y, et al. (2012) Apigenin, a plant-derived flavone, activates transient  
44 receptor potential vanilloid 4 cation channel. *Br J Pharmacol* 166: 349-358.

44

- 1 16. Jackson WF (2005) Potassium channels in the peripheral microcirculation. *Microcirculation* 12:  
2 113-127.
- 3 17. Nelson MT, Quayle JM (1995) Physiological roles and properties of potassium channels in arterial  
4 smooth muscle. *Am J Physiol* 268: C799-822.
- 5 18. Betts LC, Kozlowski RZ (2000) Electrophysiological effects of endothelin-1 and their relationship to  
6 contraction in rat renal arterial smooth muscle. *Br J Pharmacol* 130: 787-796.
- 7 19. Martens JR, Gelband CH (1996) Alterations in rat interlobar artery membrane potential and K<sup>+</sup>  
8 channels in genetic and nongenetic hypertension. *Circ Res* 79: 295-301.
- 9 20. Chadha PS, Zunke F, Zhu HL, Davis AJ, Jepps TA, et al. (2012) Reduced KCNQ4-encoded  
10 voltage-dependent potassium channel activity underlies impaired  
11 beta-adrenoceptor-mediated relaxation of renal arteries in hypertension. *Hypertension* 59:  
12 877-884.
- 13 21. Chilton L, Loutzenhiser R (2001) Functional evidence for an inward rectifier potassium current in  
14 rat renal afferent arterioles. *Circ Res* 88: 152-158.
- 15 22. Chilton L, Loutzenhiser K, Morales E, Breaks J, Kargacin GJ, et al. (2008) Inward rectifier K<sup>(+)</sup>  
16 currents and Kir2.1 expression in renal afferent and efferent arterioles. *J Am Soc Nephrol* 19:  
17 69-76.
- 18 23. Matchkov VV, Boedtker DM, Aalkjaer C (2015) The role of Ca<sup>(2+)</sup> activated Cl<sup>(-)</sup> channels in blood  
19 pressure control. *Curr Opin Pharmacol* 21: 127-137.
- 20 24. Liu Y, Niu L, Cui L, Hou X, Li J, et al. (2014) Hesperetin inhibits rat coronary constriction by  
21 inhibiting Ca<sup>(2+)</sup> influx and enhancing voltage-gated K<sup>(+)</sup> channel currents of the myocytes.  
22 *Eur J Pharmacol* 735: 193-201.
- 23 25. Sun H, Xia Y, Paudel O, Yang XR, Sham JS (2012) Chronic hypoxia-induced upregulation of  
24 Ca<sup>2+</sup>-activated Cl<sup>-</sup> channel in pulmonary arterial myocytes: a mechanism contributing to  
25 enhanced vasoreactivity. *J Physiol* 590: 3507-3521.
- 26 26. Cogolludo A, Moreno L, Bosca L, Tamargo J, Perez-Vizcaino F (2003) Thromboxane A<sub>2</sub>-induced  
27 inhibition of voltage-gated K<sup>+</sup> channels and pulmonary vasoconstriction: role of protein  
28 kinase C $\zeta$ . *Circ Res* 93: 656-663.
- 29 27. Wu GB, Zhou EX, Qing DX, Li J (2009) Role of potassium channels in regulation of rat coronary  
30 arteriole tone. *Eur J Pharmacol* 620: 57-62.
- 31 28. Park WS, Han J, Kim N, Ko JH, Kim SJ, et al. (2005) Activation of inward rectifier K<sup>+</sup> channels by  
32 hypoxia in rabbit coronary arterial smooth muscle cells. *Am J Physiol Heart Circ Physiol* 289:  
33 H2461-2467.
- 34 29. Tennant BP, Cui Y, Tinker A, Clapp LH (2006) Functional expression of inward rectifier potassium  
35 channels in cultured human pulmonary smooth muscle cells: evidence for a major role of  
36 Kir2.4 subunits. *J Membr Biol* 213: 19-29.
- 37 30. Park WS, Kim N, Youm JB, Warda M, Ko JH, et al. (2006) Angiotensin II inhibits inward rectifier K<sup>+</sup>  
38 channels in rabbit coronary arterial smooth muscle cells through protein kinase C $\alpha$ .  
39 *Biochem Biophys Res Commun* 341: 728-735.
- 40 31. Smith PD, Brett SE, Luykenaar KD, Sandow SL, Marrelli SP, et al. (2008) KIR channels function as  
41 electrical amplifiers in rat vascular smooth muscle. *J Physiol* 586: 1147-1160.
- 42 32. Chilton L, Smirnov SV, Loutzenhiser K, Wang X, Loutzenhiser R (2011) Segment-specific differences  
43 in the inward rectifier K<sup>(+)</sup> current along the renal interlobular artery. *Cardiovasc Res* 92:  
44 169-177.



- 1 33. Hayoz S, Pettis J, Bradley V, Segal SS, Jackson WF (2017) Increased amplitude of inward rectifier  
2 K(+) currents with advanced age in smooth muscle cells of murine superior epigastric  
3 arteries. *Am J Physiol Heart Circ Physiol* 312: H1203-H1214.
- 4 34. Elhennawy MG, Lin HS (2017) Quantification of apigenin trimethyl ether in rat plasma by liquid  
5 chromatography-tandem mass spectrometry: Application to a pre-clinical pharmacokinetic  
6 study. *J Pharm Biomed Anal* 142: 35-41.
- 7 35. Zhang J, Huang Y, Liu D, Gao Y, Qian S (2013) Preparation of apigenin nanocrystals using  
8 supercritical antisolvent process for dissolution and bioavailability enhancement. *Eur J Pharm  
9 Sci* 48: 740-747.
- 10 36. Hubner CA, Schroeder BC, Ehmke H (2015) Regulation of vascular tone and arterial blood  
11 pressure: role of chloride transport in vascular smooth muscle. *Pflugers Arch* 467: 605-614.
- 12 37. Salomonsson M, Brasen JC, Sorensen CM (2017) Role of renal vascular potassium channels in  
13 physiology and pathophysiology. *Acta Physiol (Oxf)*.
- 14 38. Wei X, Gao P, Pu Y, Li Q, Yang T, et al. (2017) Activation of TRPV4 by dietary apigenin antagonizes  
15 renal fibrosis in deoxycorticosterone acetate (DOCA)-salt-induced hypertension. *Clin Sci  
16 (Lond)* 131: 567-581.

17  
18  
19

20 **Figure legends:**

21 FIGURE 1. API depressed depolarization-, U46619-, PE- and VP-induced IRA contractions  
22 noncompetitively and nonspecifically. The contractive responses to the cumulative increment of  
23 KCl (A), U46619 (B), PE (C) or VP (D) were observed in the absence (control) or presence of  
24 API (10, 30, 100  $\mu$ M) in isolated IRA rings. When the vessel tension recovered to the basal tone  
25 after the control concentration-contraction curve, API was added to the bath 20 minutes before the  
26 curves of KCl, U46619, PE or VP were reconstructed again. Contractions (mN) are presented as  
27 means  $\pm$  SEM of 7 IRA rings isolated from 7 separate rats. \*  $P < 0.05$  vs the respective control.

28

29 FIGURE 2. API relaxed IRA rings precontracted with KCl, U46619, PE or VP. Relaxations are  
30 expressed as percentages of the precontraction induced by KCl (60 mM), U46619 (0.3  $\mu$ M), PE (1  
31  $\mu$ M) or VP (1  $\mu$ M), respectively. A: Original recording of the vasorelaxations induced by  
32 cumulative addition of API on IRAs precontracted with KCl, U46619, PE or VP. B and C: Pooled  
33 data (means  $\pm$  SEM) of API against KCl, PE (B), U46619 and VP (C),  $n = 7$ . \*  $P < 0.05$  vs vehicle  
34 (0.1% DMSO) control.

35

36 FIGURE 3. Effect of different inhibitors on API-induced relaxation in IRA rings precontracted by  
37 KCl or U46619. When the precontraction induced by either 60 mM KCl or 0.3  $\mu$ M U46619 was  
38 sustained, Indo (0.01 mM), L-NAME (0.01 mM), 4-AP (0.3 mM), BaCl<sub>2</sub> (30  $\mu$ M), NFA (3  $\mu$ M) or  
39 CaCC<sub>inh</sub>-A01 (3  $\mu$ M) was added to the bath respectively. When the contraction was steady again  
40 in the presence of one of these inhibitors, API (30  $\mu$ M) was added to bath. The API-induced  
41 vasodilations in the absence (control) or presence of inhibitors are expressed as percentage of the  
42 precontraction induced by KCl (A) or U46619 (B).  $n = 7$ . \*  $P < 0.05$  vs control.

43

44 FIGURE 4. Cl<sup>-</sup> deprivation attenuated API-induced relaxation in IRA precontracted with K<sup>+</sup> or

1 U46619. After API relaxations on the precontraction induced by KCl (60 mM) or U46619 (0.3  
2  $\mu\text{M}$ ) were recorded in normal PSS solution ( $\text{Cl}^+$ ), the vessels were washed with normal PSS  
3 solution and left alone to recover to the basal tone. Thereafter the vessels were incubated in  $\text{Cl}^-$   
4 deprived PSS solution ( $\text{Cl}^-$ ) for 30 min before next repetitive precontraction-relaxation  
5 procedure in  $\text{Cl}^-$ -free solution. A: Original tracings of API-induced relaxation on  $\text{K}^+$ - or  
6 U46619-induced precontraction in either normal or  $\text{Cl}^-$  deprived PSS solution. B: Pooled data of  
7 API-induced decline (percentage) on the precontractions. Results are means  $\pm$  SEM. n=7. \*  
8  $P < 0.05$  vs  $\text{Cl}^+$ .

9

10 FIGURE 5. API inhibited calcium-activated chloride currents in freshly isolated single IRA  
11 ASMCs. A: Original recordings of the outward currents evoked by a series of depolarizing pulses  
12 (from -100 mV to +100 mV in 10-mV increments, 500 ms duration) in the absence (control) or  
13 presence of API (10, 30, 100  $\mu\text{M}$ ). B: Pooled I-V curves of CaCC currents. Data are presented as  
14 means  $\pm$  SEM, n=7. \* $P < 0.05$  vs control. C: Diagrammatic time-course of CaCC currents recorded  
15 before (control), during the presence of API (100  $\mu\text{M}$ ) or  $\text{CaCC}_{\text{inh}}\text{-A01}$  (3  $\mu\text{M}$ ) and after washout  
16 of the drug at a testing potential of +100 mV.

17

18 FIGURE 6. API enhanced  $\text{K}_v$  currents in freshly isolated single IRA ASMCs. A: Original  
19 recordings of the outward currents evoked by a series of depolarizing pulses (from -60 mV to +60  
20 mV in 10 mV increments, 500 ms duration) in the absence of presence of API (10, 30, 100  $\mu\text{M}$ ). B:  
21 Pooled I-V curves of  $\text{K}_v$  currents in the absence (control) or presence of API. Data are presented  
22 as means  $\pm$  SEM, n=7. \* $P < 0.05$  vs control. C: Diagrammatic time-course of  $\text{K}_v$  currents recorded  
23 before (control), during the presence of API (100  $\mu\text{M}$ ) or 4-AP (3 mM) and after washout of the  
24 drug at a testing potential of +60 mV.

25

26 FIGURE 7. Effect of API on inward rectifier potassium channels in isolated rat IRA ASMCs. A:  
27 Original recordings of currents evoked by a series of depolarizing pulses (from -160 mV to 0 mV  
28 in 10-mV increments, 500 ms duration) in the absence (control) or presence of API (10, 30, 100  
29  $\mu\text{M}$ ). B: Diagrammatic time-course of  $\text{K}_{\text{ir}}$  currents recorded before (control), during the presence  
30 of API or  $\text{BaCl}_2$  (30  $\mu\text{M}$ ) and after washout of API at a testing potential of -160 mV. C: Summary  
31 of API effects on the I-V curves of  $\text{K}_{\text{ir}}$  current density. D: API effect on  $\text{K}_{\text{ir}}$  current density at  
32 -160 mV. Data are presented as means  $\pm$  SEM, n=7. \* $P < 0.05$  vs control.

33

**A**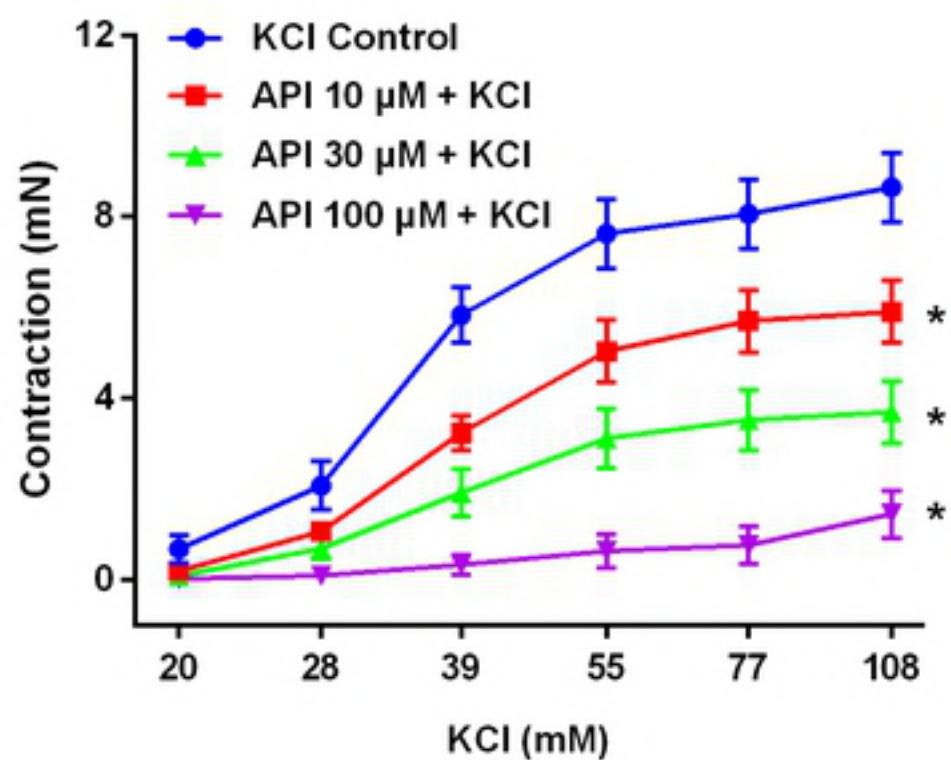**B**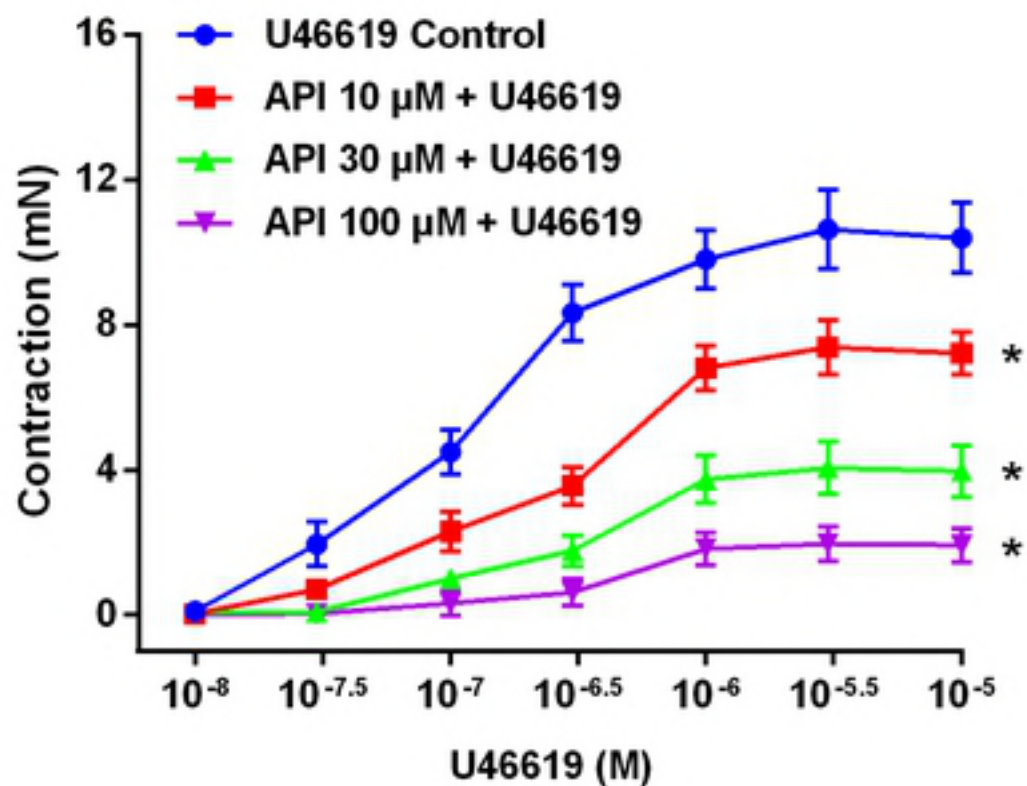**C**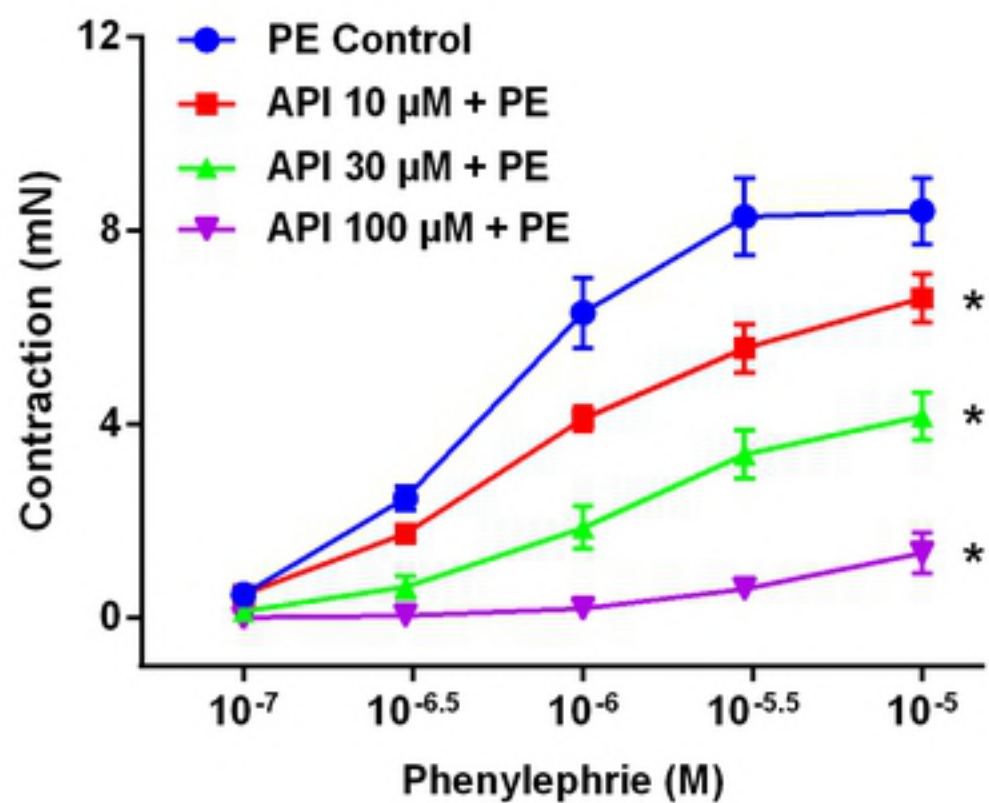**D**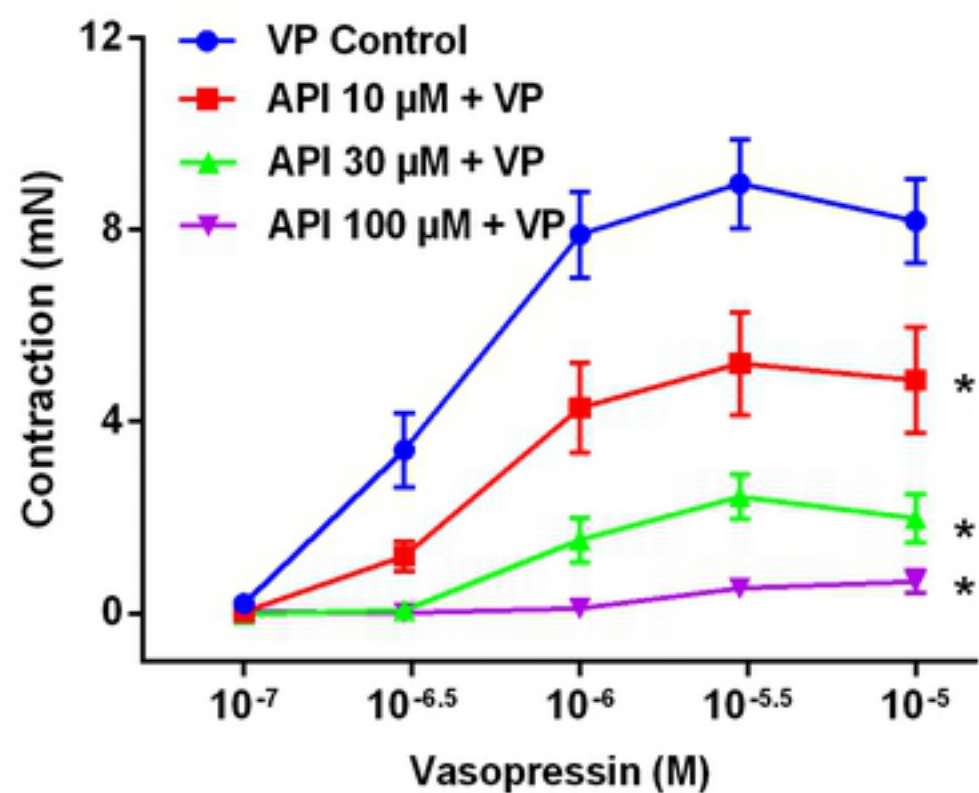

**A**

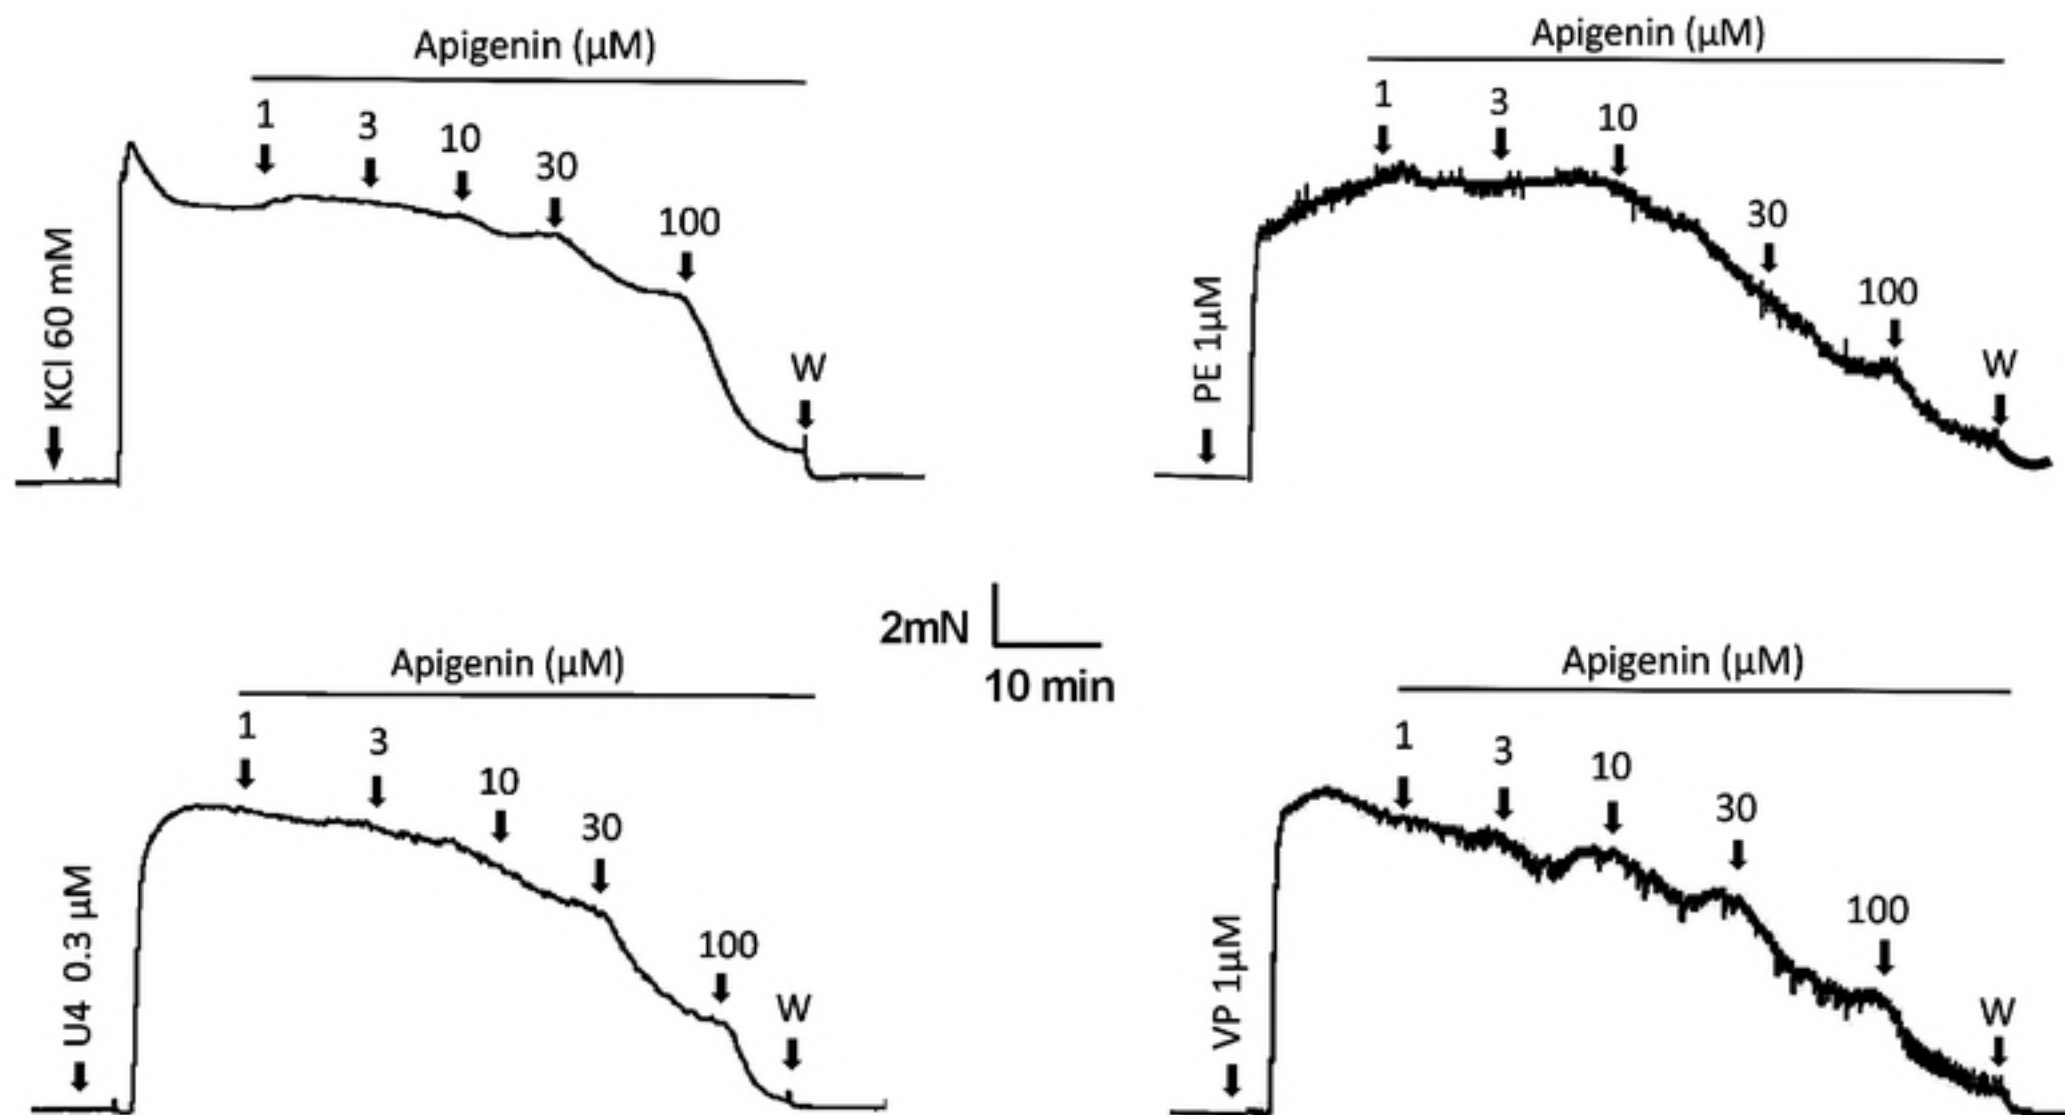

**B**

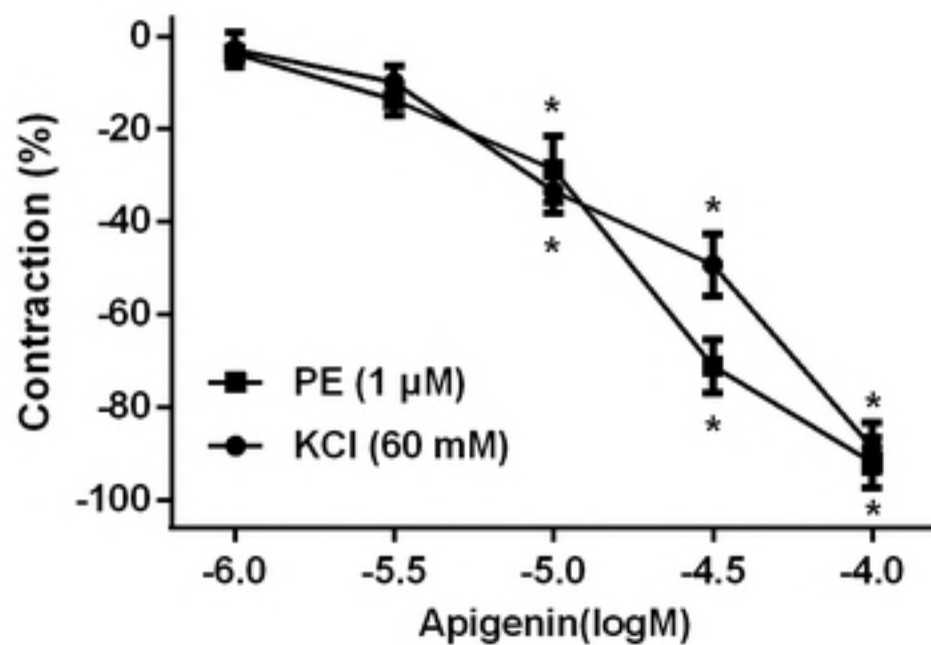

**C**

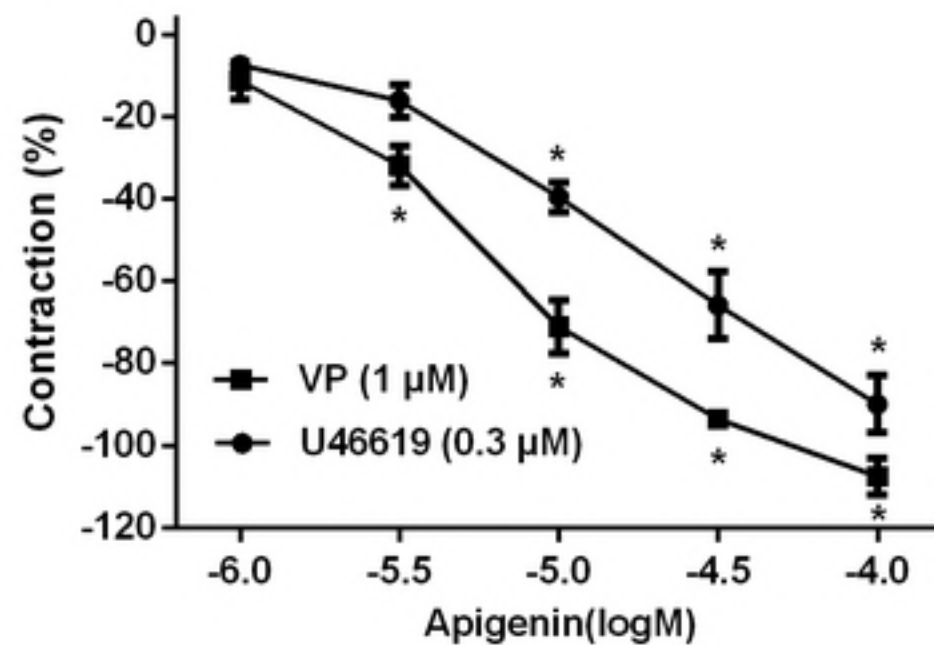

**A**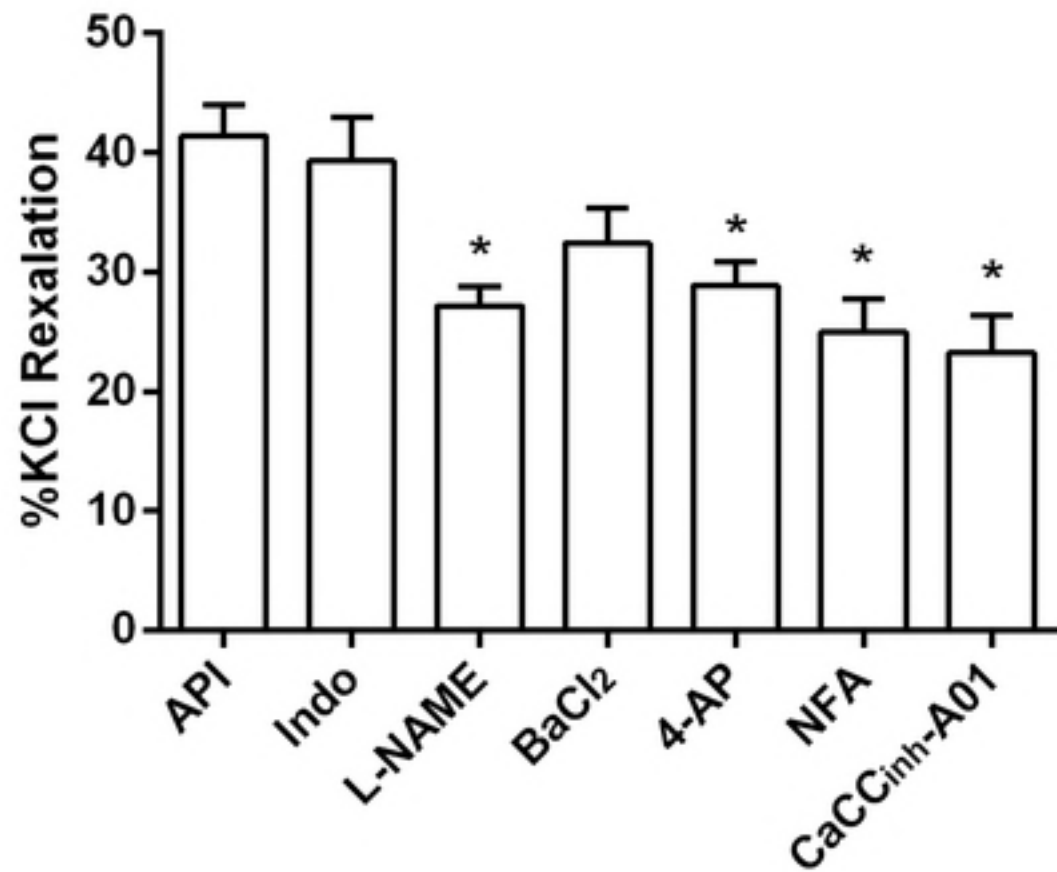**B**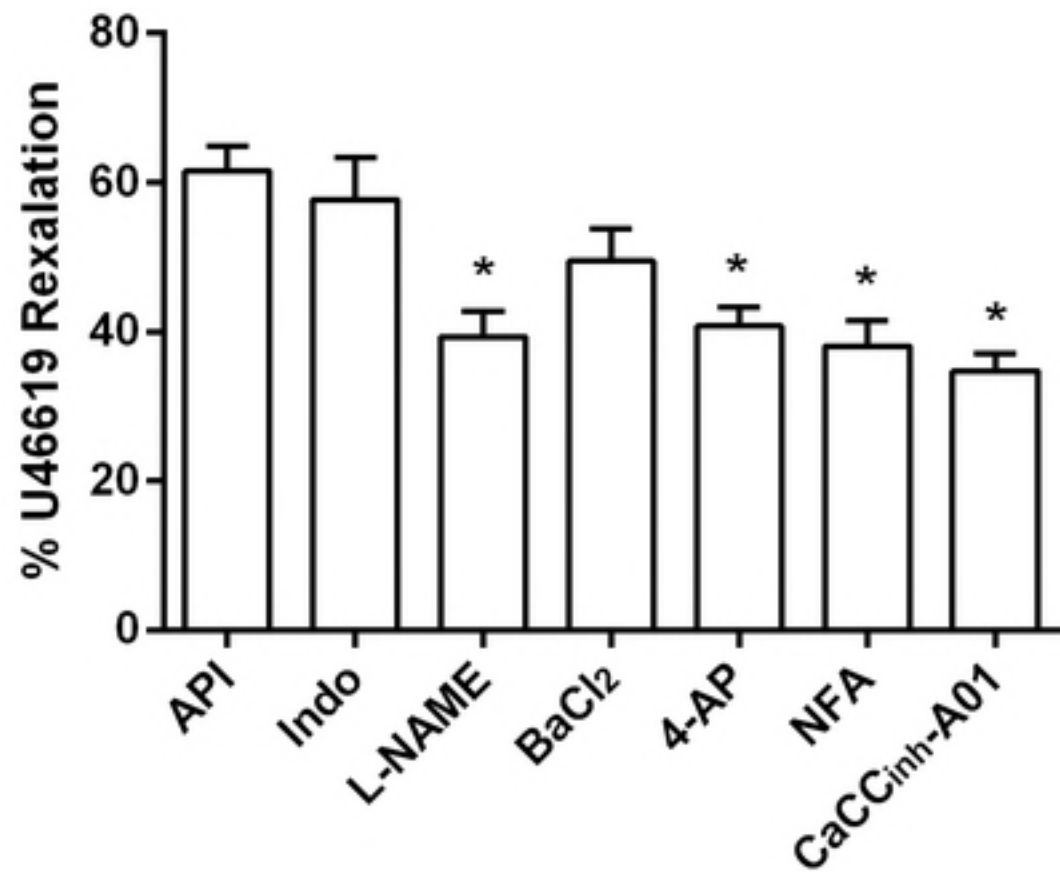



**A**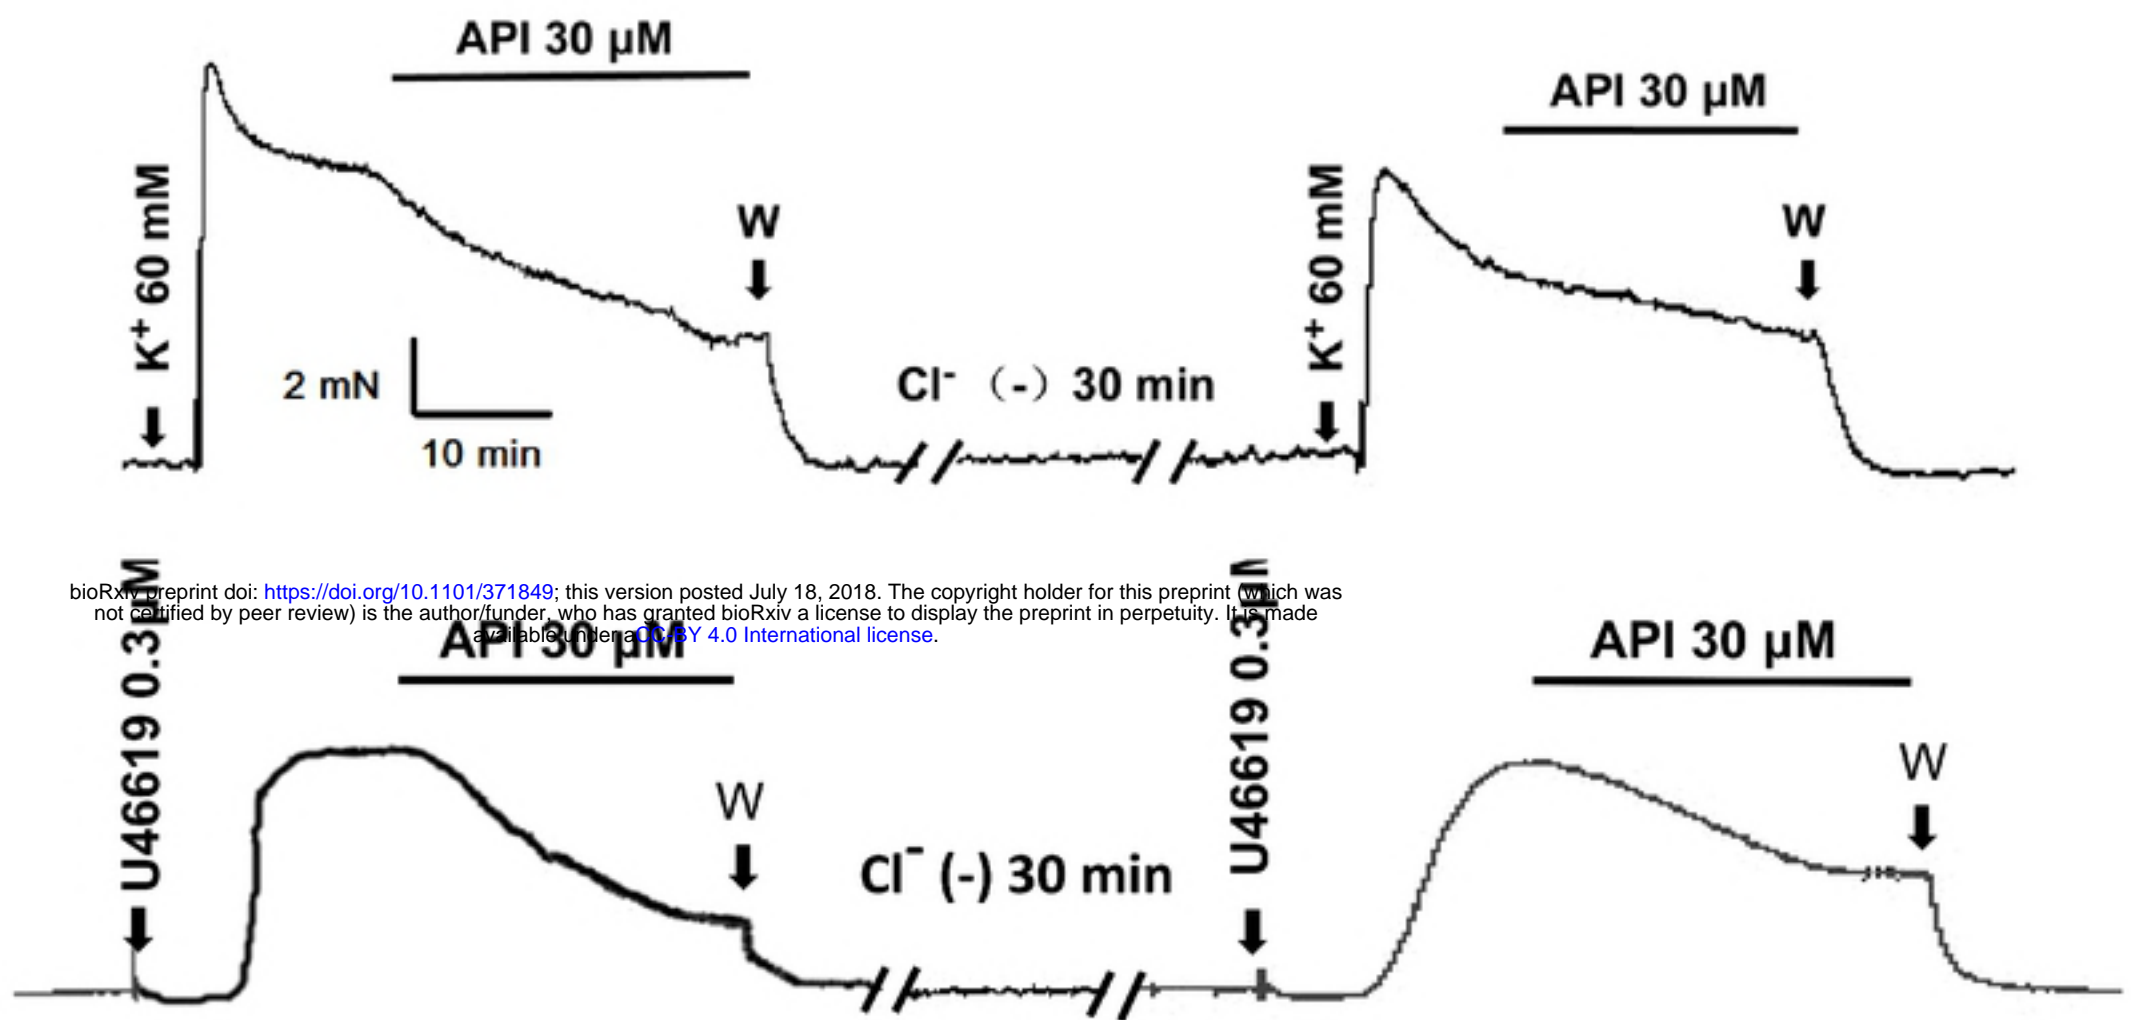

bioRxiv preprint doi: <https://doi.org/10.1101/371849>; this version posted July 18, 2018. The copyright holder for this preprint (which was not certified by peer review) is the author/funder, who has granted bioRxiv a license to display the preprint in perpetuity. It is made available under aCC-BY 4.0 International license.

**B**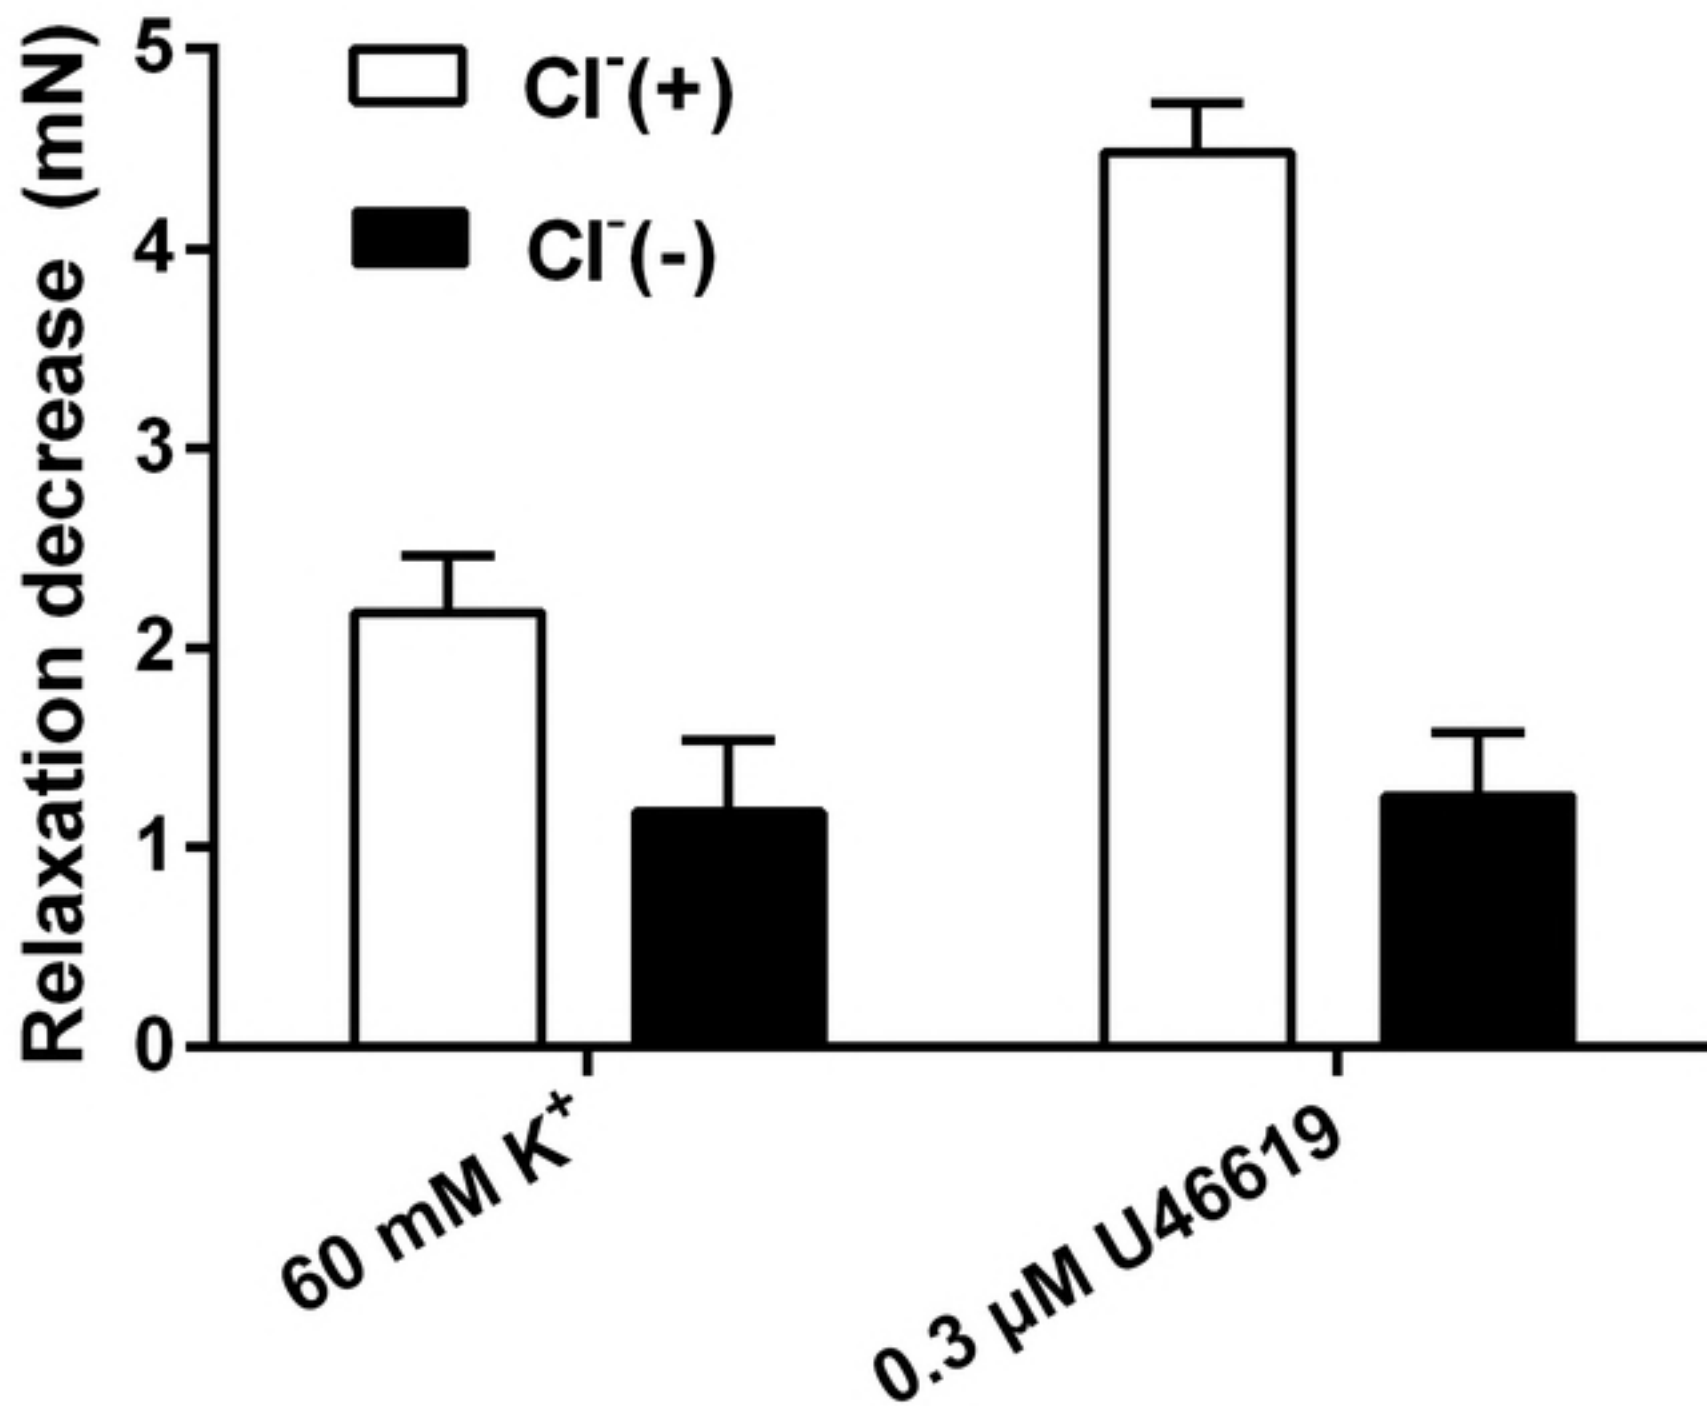



**A**

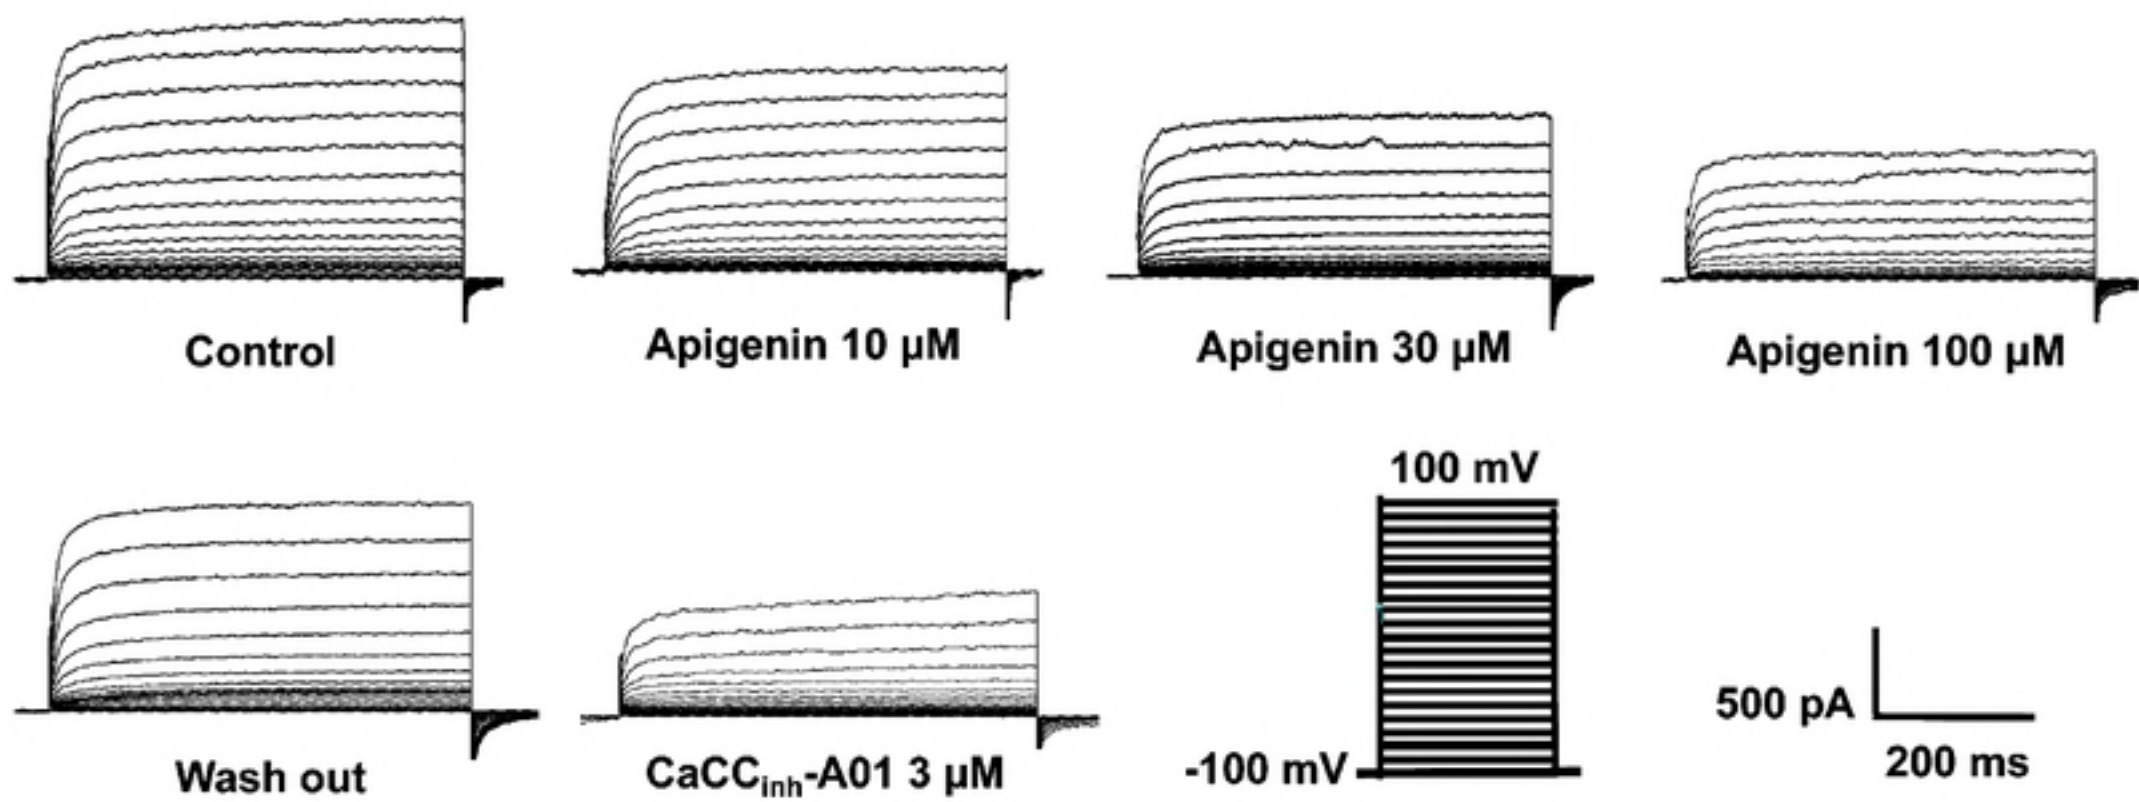

**B**

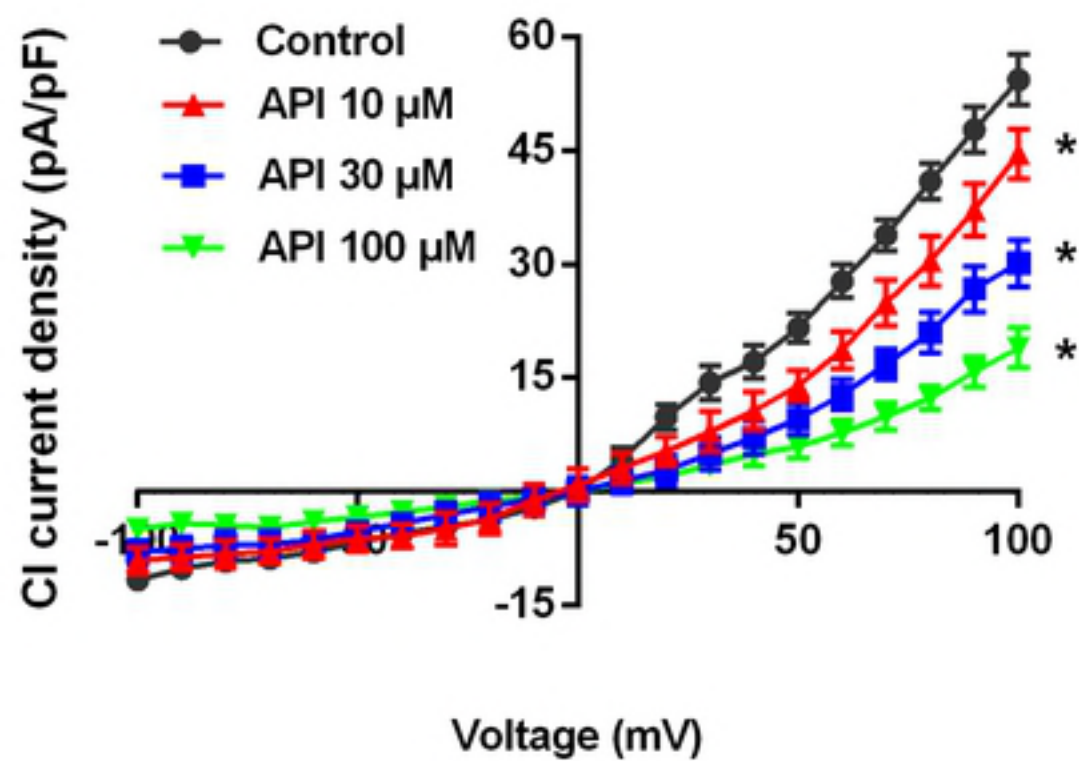

**C**

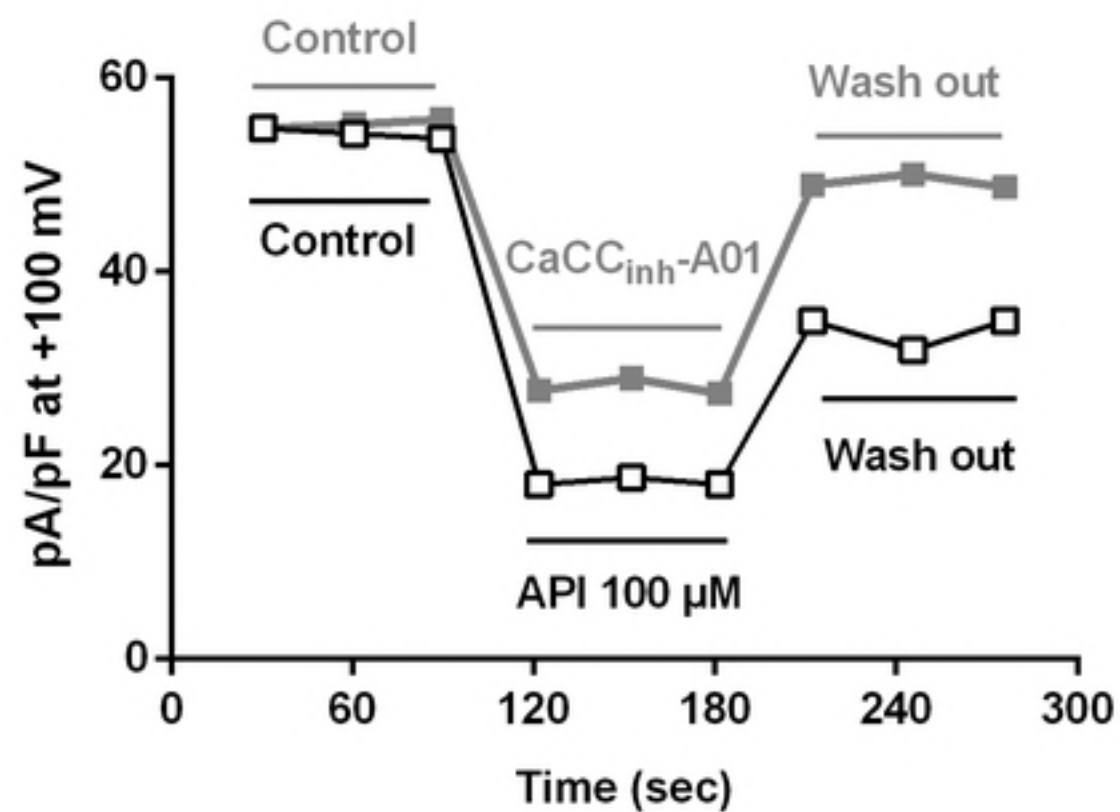

**A**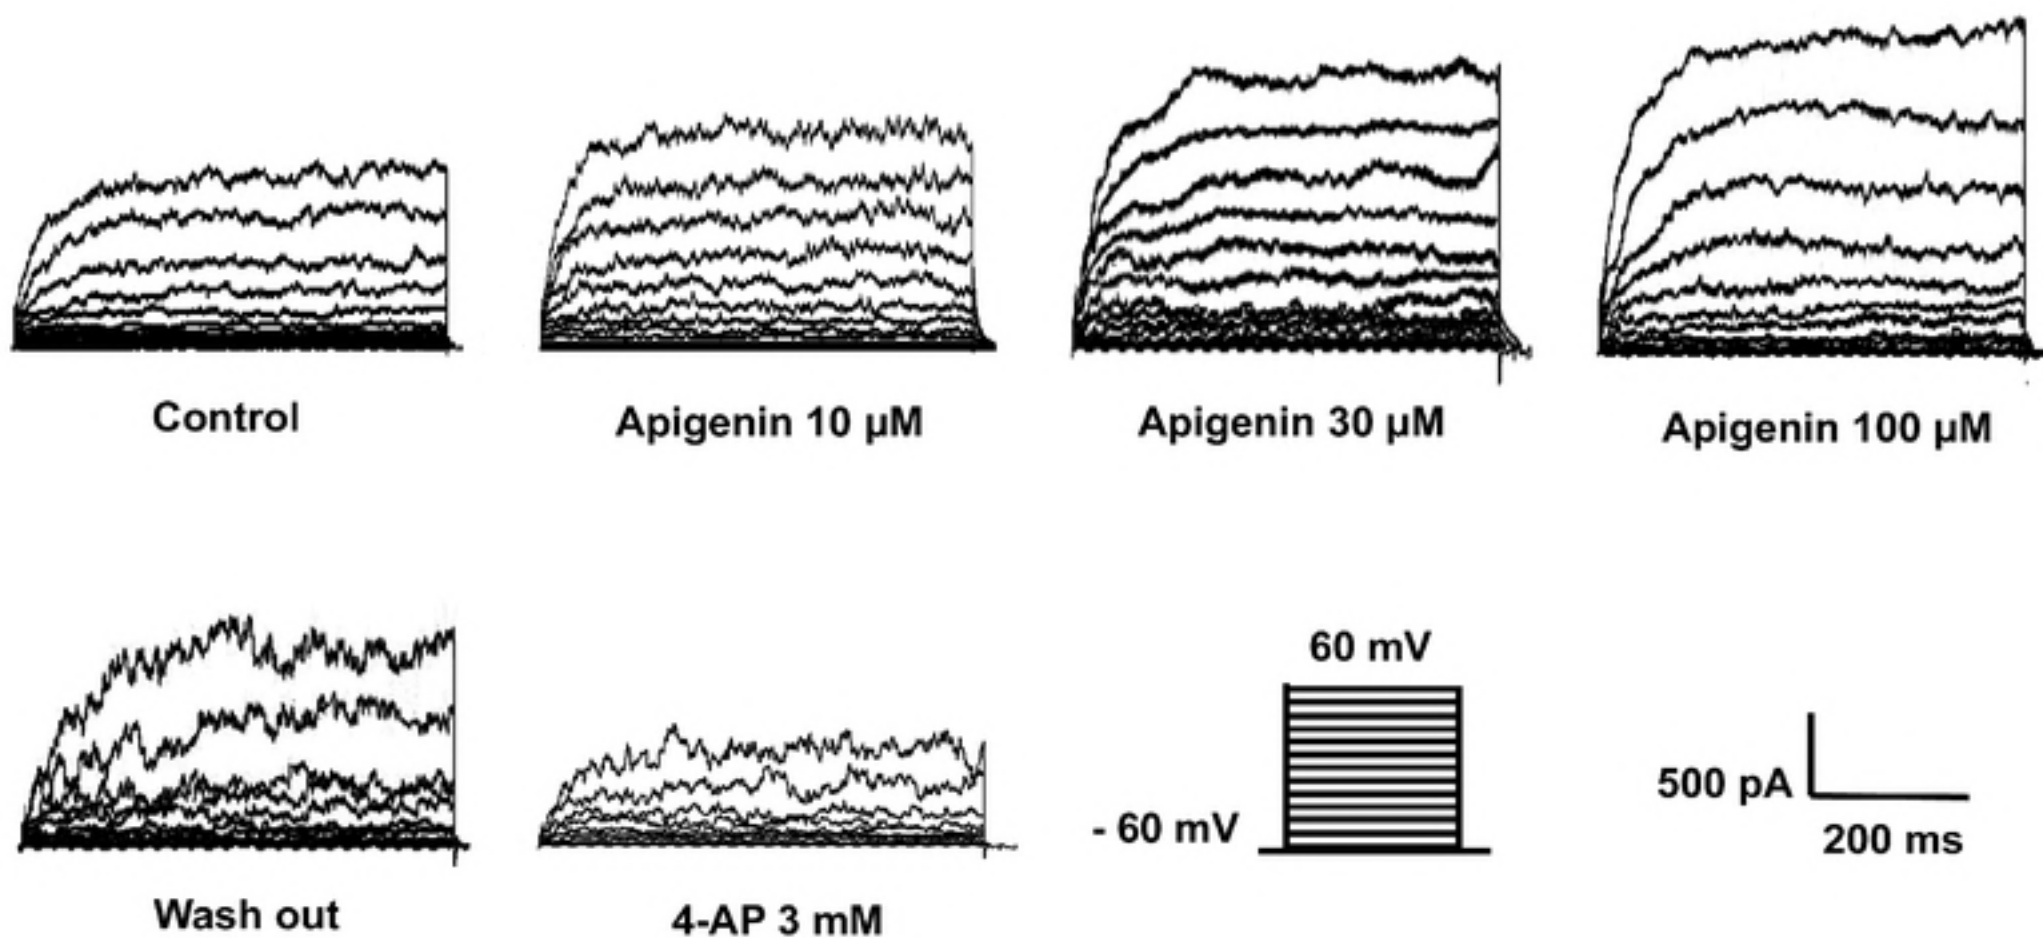**B**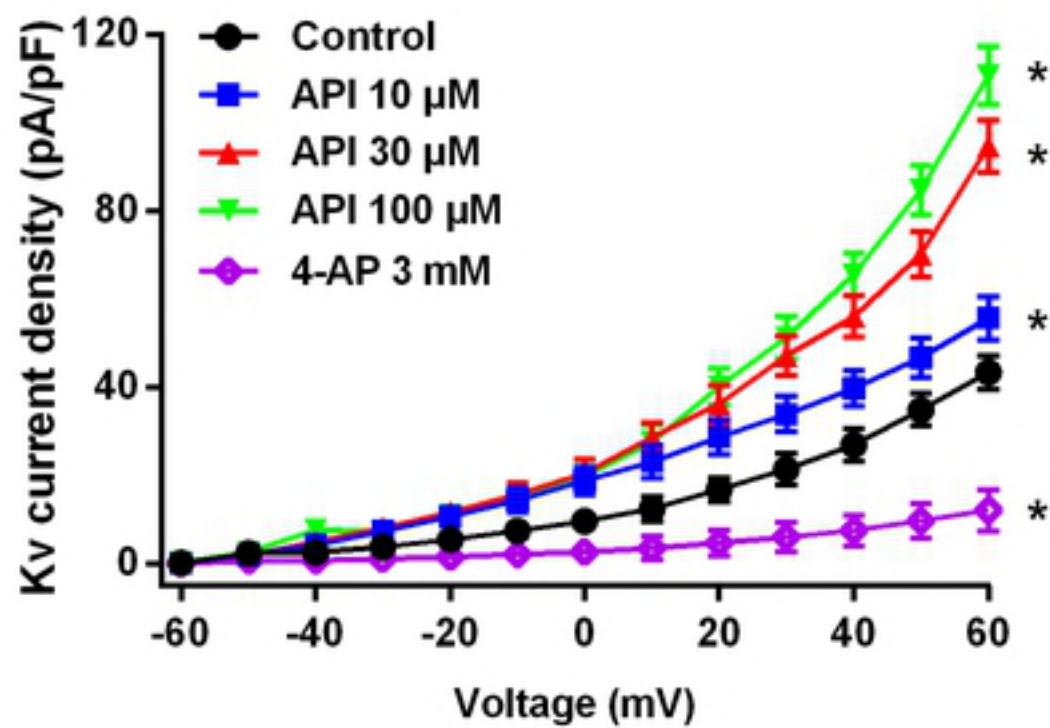**C**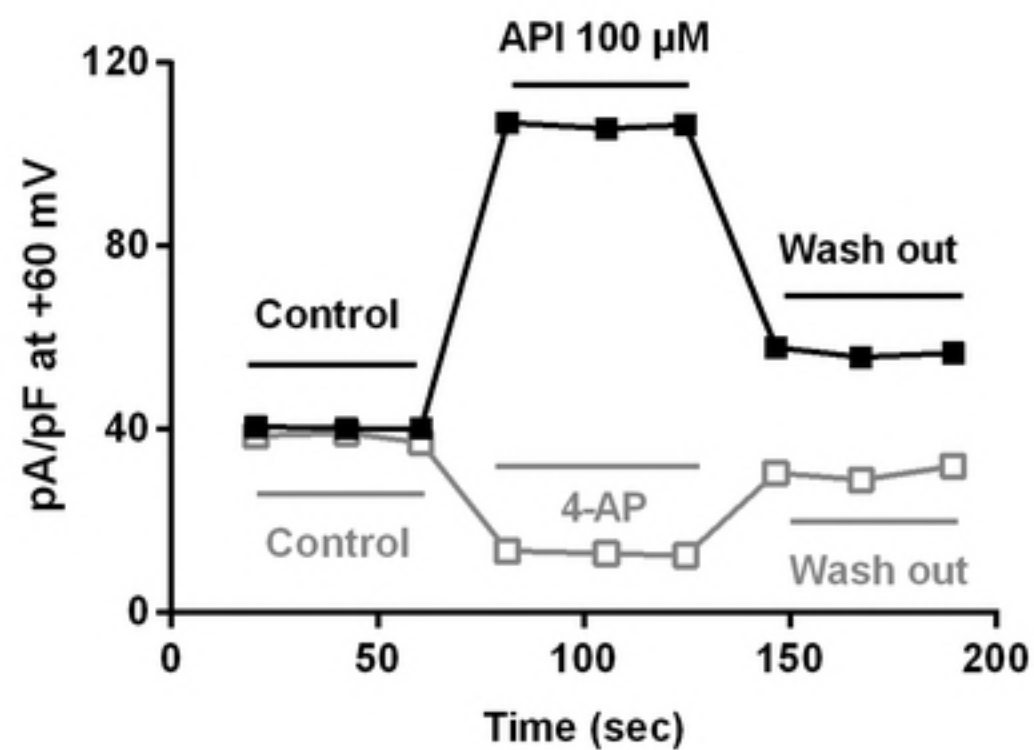

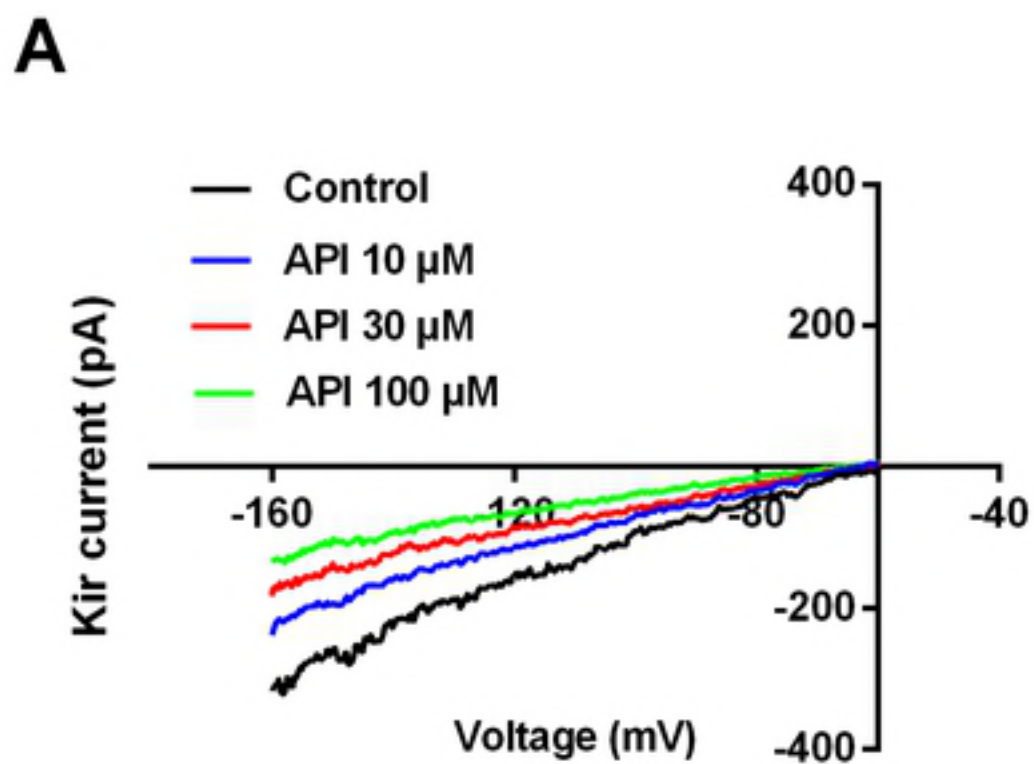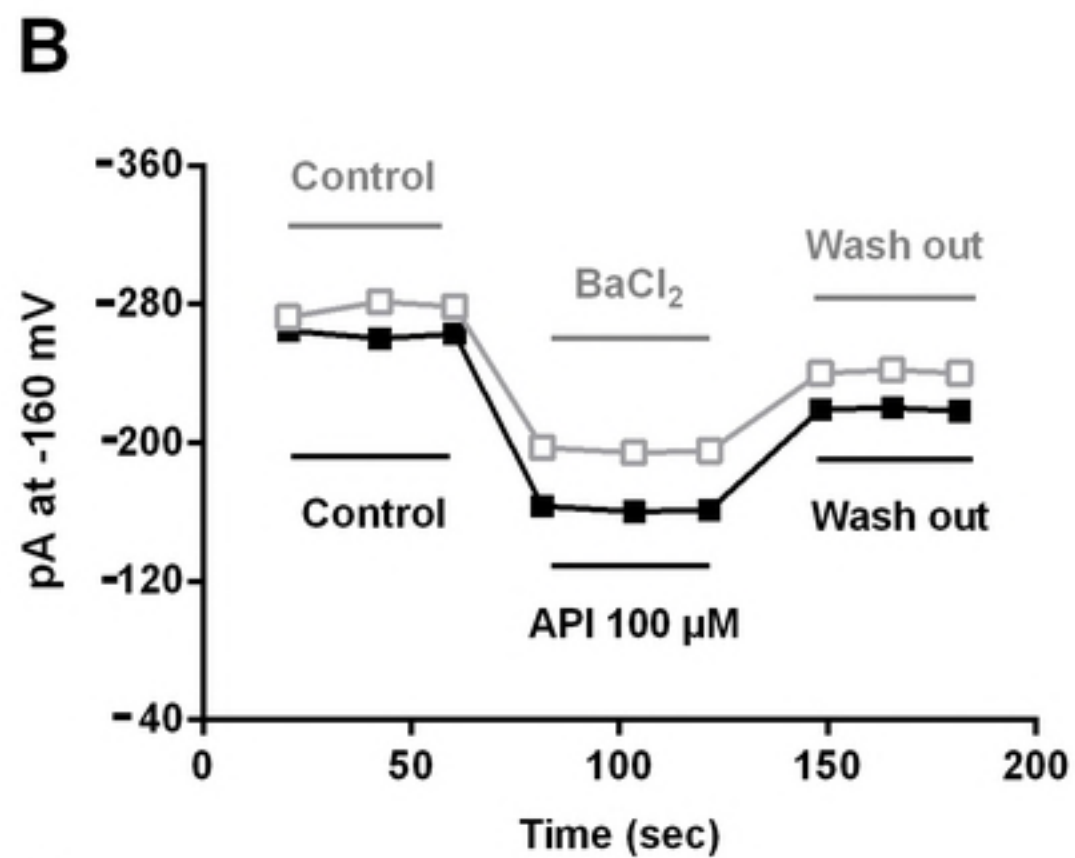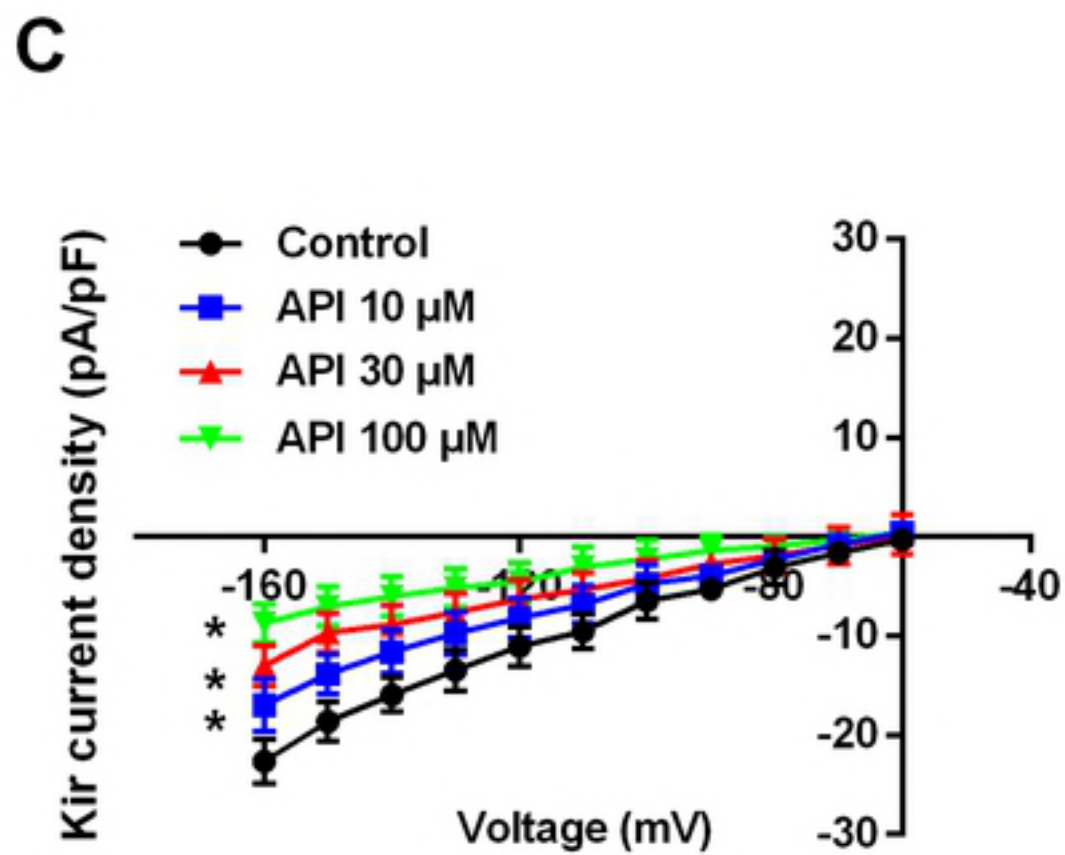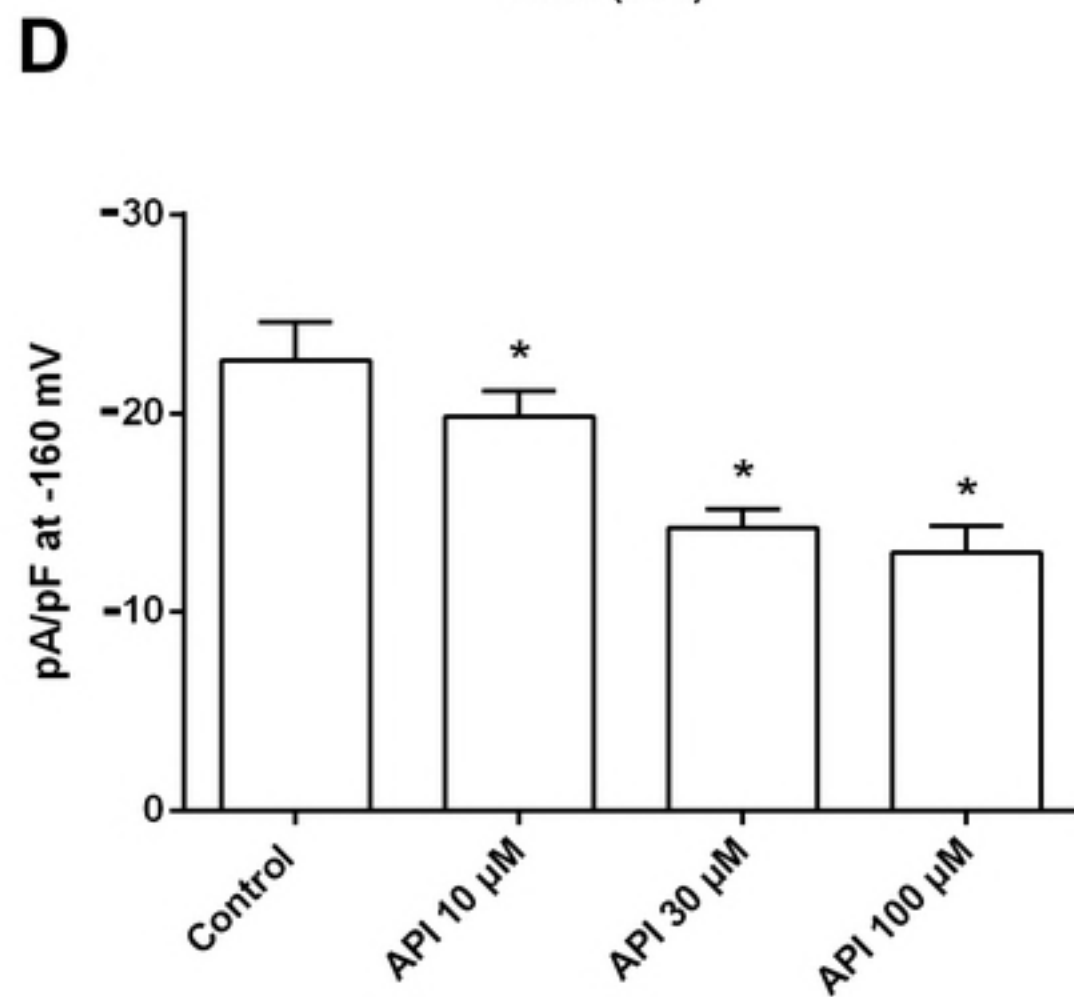

Source: https://www.biorxiv.org/content/10.1101/371849v1.full.pdf
